# Supplementary material for: Highly diastereoselective synthesis of vicinal diamines via a Rh-catalyzed three-component reaction of diazo compounds with diarylmethanimines and ketimines
Source: Royal Society of Chemistry journal article supplement (doi:10.1039/d1qo00083g), 2021-01-01
Supplement: d1qo00083g1.pdf [file d1qo00083g1.pdf]

## SUPPORTING INFORMATION

### **Highly diastereoselective synthesis of vicinal diamines *via* Rh-catalyzed three-component reaction of diazo compounds with diarylmethanimines and ketimines**

Kai Zhou, Ming Bao,\* Hongkai Sha, Guizhi Dong, Kemiao Hong, Xinfang Xu and  
Wenhao Hu\*

Guangdong Provincial Key Laboratory of Chiral Molecule and Drug Discovery,  
School of Pharmaceutical Sciences, Sun Yat-sen University, Guangzhou 510006,  
China.

E-mail: baom6@mail.sysu.edu.cn

huwh9@mail.sysu.edu.cn

### **Table of Contents**

|                                                          |                |
|----------------------------------------------------------|----------------|
| <b>1. General Information</b>                            | <b>S2</b>      |
| <b>2. General Procedure for the Synthesis of 4 and 5</b> | <b>S2-S15</b>  |
| <b>3. Control Experiment</b>                             | <b>S15</b>     |
| <b>4. General Procedure for Scale up</b>                 | <b>S16</b>     |
| <b>5. Derivatization</b>                                 | <b>S17</b>     |
| <b>6. References</b>                                     | <b>S17</b>     |
| <b>7. NMR Spectra</b>                                    | <b>S18-S45</b> |
| <b>8. Single-Crystal X-ray Diffraction of 4j and 5e</b>  | <b>S46-S47</b> |

## General Information

**General.** All reactions were carried out in oven-dried glassware. Flash column chromatography was performed using silica gel (300-400 mesh). Analytical thin-layer chromatography was performed using glass plates pre-coated with 200-300 mesh silica gel impregnated with a fluorescent indicator (254 nm).  $^1\text{H}$  NMR and  $^{13}\text{C}$  NMR spectra were recorded in  $\text{CDCl}_3$  or  $\text{DMSO}-d_6$  on a 400 or 500 MHz spectrometer; chemical shifts were reported in ppm with the solvent signal as reference, and coupling constants ( $J$ ) were given in Hertz. The peak information was described as: br = broad, s = singlet, d = doublet, t = triplet, q = quartet, m = multiplet, comp = composite. High-resolution mass spectra (HRMS) were recorded on a commercial apparatus (ESI or CI Source).

**Materials.** Anhydrous solvent was distilled from Na by following the standard purification procedure. All catalysts, including  $\text{Rh}_2(\text{OAc})_4$  and  $\text{Rh}_2(\text{esp})_2$  were purchased from chemical vendor, and used directly without additional treatment. Diazo compounds **1** were prepared according to the literature<sup>1</sup>. Diarylmethanimines **2** were prepared according to the literature<sup>2</sup> or purchased from chemical vendor. Isatin-derived ketimines **3** were prepared according to the literature<sup>3</sup>.

## General Procedure for the Synthesis of **4** and **5**

To a 10-mL oven-dried vial containing stirring bar,  $\text{Rh}_2(\text{OAc})_4$  (0.5 mg, 0.5 mol%) or  $\text{Rh}_2(\text{esp})_2$  (1.5 mg, 1.0 mol%), 50 mg 4Å MS, benzophenone imine **2** (0.24 mmol), and isatin-derived ketimine **3** (0.20 mmol) in 1,4-dioxane (3.0 mL), diazo compounds **1** (0.30 mmol) in 1,4-dioxane (1.0 mL) was added slowly *via* a syringe pump over 2 h under argon atmosphere at room temperature, and the reaction mixture was stirred for additional 36 h or 10 h. After the completion of the reaction (monitored by TLC), the solvent was evaporated *in vacuo* and the residue was purified by flash chromatography on silica gel (Hexanes : EtOAc = 10:1 to 5:1) to give the pure products **4** or **5** in good to high yields.

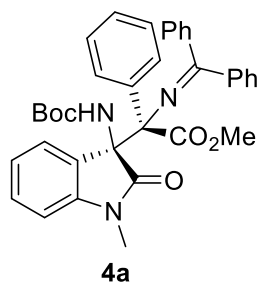

### Methyl

**(*R*\*)-2-((*S*\*)-3-((*tert*-butoxycarbonyl)amino)-1-methyl-2-oxoindolin-3-yl)-2-((diphenylmethylene)amino)-2-phenylacetate (**4a**).** 109.8 mg, 93%. Yellow solid; mp = 184.1-185.7 °C; <sup>1</sup>H NMR (500 MHz, CDCl<sub>3</sub>) δ 7.88 – 7.83 (m, 1H), 7.82 – 7.71 (m, 2H), 7.59 – 7.50 (m, 1H), 7.50 – 7.42 (m, 2H), 7.33 – 7.08 (comp, 4H), 7.06 – 6.81 (comp, 6H), 6.80 – 6.51 (comp, 3H), 6.29 – 6.13 (m, 1H), 3.28 (s, 3H), 2.92 (s, 3H), 1.47 – 0.94 (m, 9H); <sup>13</sup>C NMR (125 MHz, CDCl<sub>3</sub>) δ 174.3, 172.5, 169.2, 154.4, 143.3, 141.3, 136.8, 136.0, 131.0, 129.5, 129.1, 129.0, 128.6, 128.4, 127.4, 127.3, 125.7, 125.1, 122.1, 106.9, 79.9, 75.7, 70.0, 52.2, 28.2, 25.8; HRMS (TOF MS ESI+) calculated for C<sub>36</sub>H<sub>36</sub>N<sub>3</sub>O<sub>5</sub> [M+H]<sup>+</sup>: 590.2649, found 590.2643.

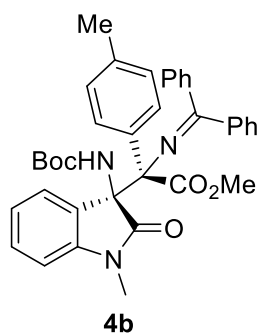

### Methyl

**(*R*\*)-2-((*S*\*)-3-((*tert*-butoxycarbonyl)amino)-1-methyl-2-oxoindolin-3-yl)-2-((diphenylmethylene)amino)-2-(*p*-tolyl)acetate (**4b**).** 108.6 mg, 90%. Yellow solid; mp = 161.1-162.5 °C; <sup>1</sup>H NMR (500 MHz, CDCl<sub>3</sub>) δ 7.89 – 7.81 (m, 1H), 7.80 – 7.70 (m, 2H), 7.59 – 7.50 (m, 1H), 7.49 – 7.39 (m, 2H), 7.28 – 7.20 (m, 1H), 7.19 – 6.97 (comp, 4H), 6.95 – 6.82 (m, 2H), 6.81 – 6.48 (comp, 5H), 6.30 – 6.12 (m, 1H), 3.25 (s, 3H), 2.92 (s, 3H), 2.15 (s, 3H), 1.45 – 0.94 (m, 9H); <sup>13</sup>C NMR (125 MHz, CDCl<sub>3</sub>) δ 174.4, 172.2, 169.3, 154.5, 143.4, 141.4, 136.9, 136.1, 133.7, 130.9, 129.5, 129.0, 128.6, 128.4, 127.4, 126.4, 125.1, 122.0, 106.9, 79.8, 75.6, 70.0, 52.1, 28.2, 25.8, 21.0; HRMS (TOF MS ESI+) calculated for C<sub>37</sub>H<sub>38</sub>N<sub>3</sub>O<sub>5</sub> [M+H]<sup>+</sup>: 604.2806, found 604.2807.

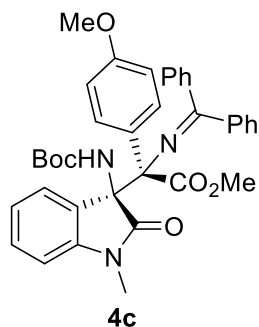

### Methyl

**(*R*\*)-2-((*S*\*)-3-((*tert*-butoxycarbonyl)amino)-1-methyl-2-oxoindolin-3-yl)-2-((diphenylmethylene)amino)-2-(4-methoxyphenyl)acetate (4c).** 105.7 mg, 85%. Yellow solid; mp = 174.2-175.8 °C; <sup>1</sup>H NMR (500 MHz, CDCl<sub>3</sub>) δ 7.91 – 7.82 (m, 1H), 7.80 – 7.68 (m, 2H), 7.58 – 7.49 (m, 1H), 7.49 – 7.40 (m, 2H), 7.31 – 7.22 (m, 1H), 7.20 – 6.95 (comp, 4H), 6.93 – 6.71 (comp, 4H), 6.69 – 6.29 (comp, 3H), 6.29 – 6.14 (m, 1H), 3.67 (s, 3H), 3.27 (s, 3H), 2.92 (s, 3H), 1.48 – 0.92 (m, 9H); <sup>13</sup>C NMR (125 MHz, CDCl<sub>3</sub>) δ 174.3, 172.3, 169.2, 158.5, 154.4, 143.3, 141.3, 136.0, 130.9, 129.4, 129.0, 128.9, 128.6, 128.4, 127.4, 125.0, 122.0, 111.0, 107.0, 79.8, 75.3, 70.0, 55.2, 52.1, 28.2, 25.8; HRMS (TOF MS ESI<sup>+</sup>) calculated for C<sub>37</sub>H<sub>38</sub>N<sub>3</sub>O<sub>6</sub> [M+H]<sup>+</sup>: 620.2755, found 620.2757.

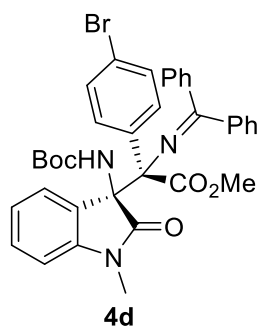

### Methyl

**(*R*\*)-2-(4-bromophenyl)-2-((*S*\*)-3-((*tert*-butoxycarbonyl)amino)-1-methyl-2-oxoindolin-3-yl)-2-((diphenylmethylene)amino)acetate (4d).** 107.2 mg, 80%. Yellow solid; mp = 169.1-170.2 °C; <sup>1</sup>H NMR (500 MHz, CDCl<sub>3</sub>) δ 7.87 – 7.80 (m, 1H), 7.80 – 7.71 (m, 2H), 7.58 – 7.52 (m, 1H), 7.50 – 7.45 (m, 2H), 7.28 – 7.25 (m, 1H), 7.22 – 6.94 (comp, 6H), 6.93 – 6.88 (m, 1H), 6.86 – 6.43 (comp, 4H), 6.32 – 6.23 (m, 1H), 3.28 (s, 3H), 2.93 (s, 3H), 1.40 – 0.99 (m, 9H); <sup>13</sup>C NMR (125 MHz, CDCl<sub>3</sub>) δ 174.1, 173.0, 168.7, 154.4, 143.2, 141.1, 136.0, 135.9, 131.2, 129.5, 129.3, 129.0, 128.9, 128.5, 127.5, 125.1, 122.3, 121.9, 107.2, 80.1, 75.3, 69.8, 52.3, 28.2, 25.9; HRMS (TOF MS ESI<sup>+</sup>) calculated for C<sub>36</sub>H<sub>35</sub>BrN<sub>3</sub>O<sub>5</sub> [M+H]<sup>+</sup>: 668.1755, found 668.1748.

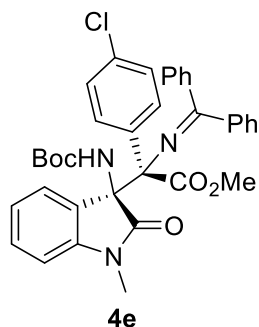

### Methyl

**(*R*\*)-2-((*S*\*)-3-((*tert*-butoxycarbonyl)amino)-1-methyl-2-oxoindolin-3-yl)-2-(4-chlorophenyl)-2-((diphenylmethylene)amino)acetate (4e).** 107.6 mg, 86%. Yellow solid; mp = 167.1-168.5 °C;  $^1\text{H}$  NMR (500 MHz,  $\text{CDCl}_3$ )  $\delta$  7.87 – 7.81 (m, 1H), 7.80 – 7.73 (m, 2H), 7.59 – 7.52 (m, 1H), 7.51 – 7.44 (m, 2H), 7.29 – 7.25 (m, 1H), 7.23 – 7.01 (comp, 4H), 7.00 – 6.39 (comp, 7H), 6.32 – 6.23 (m, 1H), 3.29 (s, 3H), 2.93 (s, 3H), 1.45 – 0.90 (m, 9H);  $^{13}\text{C}$  NMR (125 MHz,  $\text{CDCl}_3$ )  $\delta$  174.1, 173.0, 168.7, 154.4, 143.2, 141.1, 135.9, 135.5, 133.4, 131.2, 129.5, 129.2, 129.0, 128.8, 128.5, 127.5, 125.8, 125.1, 122.2, 107.2, 80.0, 75.2, 69.8, 52.3, 28.2, 25.9; HRMS (TOF MS  $\text{ESI}^+$ ) calculated for  $\text{C}_{36}\text{H}_{35}\text{ClN}_3\text{O}_5$   $[\text{M}+\text{H}]^+$ : 624.2260, found 624.2259.

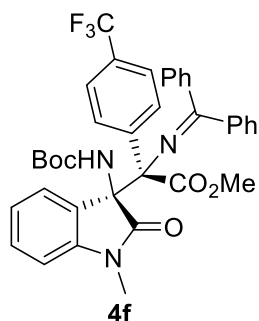

### Methyl

**(*R*\*)-2-((*S*\*)-3-((*tert*-butoxycarbonyl)amino)-1-methyl-2-oxoindolin-3-yl)-2-((diphenylmethylene)amino)-2-(4-(trifluoromethyl)phenyl)acetate (4f).** 108.1 mg, 82%. Yellow solid; mp = 197.2-198.7 °C;  $^1\text{H}$  NMR (500 MHz,  $\text{CDCl}_3$ )  $\delta$  7.87 – 7.81 (m, 1H), 7.81 – 7.74 (m, 2H), 7.59 – 7.53 (m, 1H), 7.52 – 7.46 (m, 2H), 7.32 – 7.27 (m, 1H), 7.23 – 7.08 (comp, 4H), 7.07 – 6.83 (comp, 3H), 6.81 – 6.50 (comp, 3H), 6.26 – 6.13 (m, 1H), 3.31 (s, 3H), 2.91 (s, 3H), 1.34 – 1.03 (m, 9H);  $^{13}\text{C}$  NMR (125 MHz,  $\text{CDCl}_3$ )  $\delta$  174.0, 173.3, 168.5, 154.4, 143.0, 141.0, 140.8, 135.8, 131.3, 129.5, 129.34, 129.30, 129.1, 128.8, 128.5, 127.6, 125.1, 124.0 (q,  $J = 271.3$  Hz), 122.4, 122.3, 107.1, 80.1, 75.5, 69.9, 52.4, 28.2, 25.8;  $^{19}\text{F}$  NMR (470 MHz,  $\text{CDCl}_3$ )  $\delta$  -62.8; HRMS (TOF MS  $\text{ESI}^+$ ) calculated for  $\text{C}_{37}\text{H}_{35}\text{F}_3\text{N}_3\text{O}_5$   $[\text{M}+\text{H}]^+$ : 658.2523, found 658.2518.

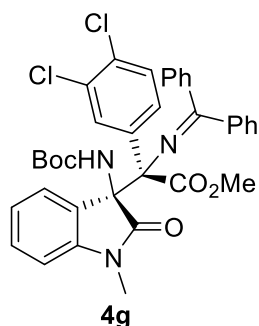

### Methyl

**(*R*\*)-2-((*S*\*)-3-((*tert*-butoxycarbonyl)amino)-1-methyl-2-oxoindolin-3-yl)-2-(3,4-dichlorophenyl)-2-((diphenylmethylene)amino)acetate (4g).** 112.0 mg, 85%. Yellow solid; mp = 141.1-142.9 °C; <sup>1</sup>H NMR (500 MHz, CDCl<sub>3</sub>) δ 7.86 – 7.79 (m, 1H), 7.79 – 7.71 (m, 2H), 7.60 – 7.53 (m, 1H), 7.52 – 7.45 (m, 2H), 7.33 – 7.27 (m, 1H), 7.26 – 6.99 (comp, 4H), 6.99 – 6.38 (comp, 6H), 6.37 – 6.29 (m, 1H), 3.30 (s, 3H), 2.99 (s, 3H), 1.44 – 0.96 (m, 9H); <sup>13</sup>C NMR (125 MHz, CDCl<sub>3</sub>) δ 173.9, 173.6, 168.4, 154.3, 143.1, 140.9, 137.0, 135.7, 131.6, 131.4, 130.2, 129.6, 129.4, 129.2, 128.8, 128.5, 127.6, 127.4, 125.1, 122.4, 107.3, 80.2, 74.9, 69.8, 52.5, 28.2, 26.0; HRMS (TOF MS ESI<sup>+</sup>) calculated for C<sub>36</sub>H<sub>34</sub>Cl<sub>2</sub>N<sub>3</sub>O<sub>5</sub> [M+H]<sup>+</sup>: 658.1870, found 658.1871.

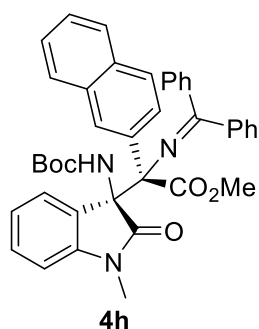

### Methyl

**(*R*\*)-2-((*S*\*)-3-((*tert*-butoxycarbonyl)amino)-1-methyl-2-oxoindolin-3-yl)-2-((diphenylmethylene)amino)-2-(naphthalen-2-yl)acetate (4h).** 102.3 mg, 80%. Yellow solid; mp = 137.2-138.9 °C; <sup>1</sup>H NMR (500 MHz, CDCl<sub>3</sub>) δ 7.92 – 7.88 (m, 1H), 7.86 – 7.80 (m, 2H), 7.73 – 7.54 (comp, 3H), 7.53 – 7.31 (comp, 5H), 7.23 – 7.18 (m, 1H), 7.16 – 6.91 (comp, 3H), 6.89 – 6.50 (comp, 5H), 6.01 – 5.91 (m, 1H), 3.32 (s, 3H), 2.84 (s, 3H), 1.34 – 1.05 (comp, 9H); <sup>13</sup>C NMR (125 MHz, CDCl<sub>3</sub>) δ 174.3, 172.8, 169.1, 154.4, 143.2, 141.3, 136.0, 132.1, 131.7, 131.1, 129.6, 129.1, 128.9, 128.7, 128.6, 128.5, 128.4, 127.4, 127.1, 126.3, 125.6, 125.1, 124.7, 122.0, 106.9, 79.9, 75.8, 70.1, 52.3, 28.2, 25.9; HRMS (TOF MS ESI<sup>+</sup>) calculated for C<sub>40</sub>H<sub>38</sub>N<sub>3</sub>O<sub>5</sub> [M+H]<sup>+</sup>: 640.2806, found 640.2801.

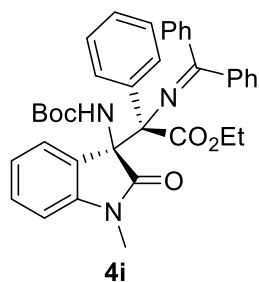

### Ethyl

**(*R*\*)-2-((*S*\*)-3-((*tert*-butoxycarbonyl)amino)-1-methyl-2-oxoindolin-3-yl)-2-((diphenylmethylene)amino)-2-phenylacetate (**4i**).** 101.8 mg, 84%. Yellow solid; mp = 172.1-173.4 °C; <sup>1</sup>H NMR (500 MHz, CDCl<sub>3</sub>) δ 7.90 – 7.84 (m, 1H), 7.83 – 7.74 (m, 2H), 7.57 – 7.52 (m, 1H), 7.51 – 7.45 (m, 2H), 7.25 – 7.21 (m, 1H), 7.14 – 7.09 (m, 2H), 7.08 – 6.95 (comp, 3H), 6.95 – 6.83 (comp, 3H), 6.81 – 6.64 (comp, 3H), 6.25 – 6.13 (m, 1H), 3.79 – 3.55 (m, 2H), 2.91 (s, 3H), 1.46 – 0.97 (m, 12H); <sup>13</sup>C NMR (125 MHz, CDCl<sub>3</sub>) δ 174.3, 172.3, 168.5, 154.4, 143.3, 141.3, 136.9, 136.1, 131.0, 129.5, 129.4, 129.0, 128.6, 128.4, 127.4, 127.3, 125.7, 125.2, 122.0, 106.9, 79.8, 75.6, 70.0, 61.6, 28.3, 25.8, 13.7; HRMS (TOF MS ESI<sup>+</sup>) calculated for C<sub>37</sub>H<sub>38</sub>N<sub>3</sub>O<sub>5</sub> [M+H]<sup>+</sup>: 604.2806, found 604.2803.

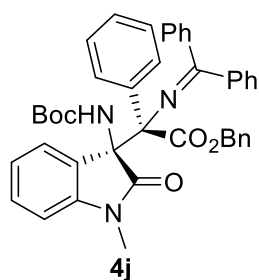

### Benzyl

**(*R*\*)-2-((*S*\*)-3-((*tert*-butoxycarbonyl)amino)-1-methyl-2-oxoindolin-3-yl)-2-((diphenylmethylene)amino)-2-phenylacetate (**4j**).** 115.3 mg, 87%. Yellow solid; mp = 175.2-176.8 °C; <sup>1</sup>H NMR (500 MHz, CDCl<sub>3</sub>) δ 7.88 – 7.73 (m, 2H), 7.45 – 7.32 (comp, 5H), 7.29 – 7.25 (m, 2H), 7.23 – 7.14 (m, 2H), 7.11 – 6.87 (comp, 6H), 6.83 – 6.58 (comp, 3H), 6.46 – 6.20 (m, 1H), 6.18 – 5.59 (m, 2H), 5.33 – 4.82 (m, 1H), 4.69 – 4.35 (m, 1H), 2.51 (s, 3H), 1.61 – 0.93 (m, 9H); <sup>13</sup>C NMR (125 MHz, CDCl<sub>3</sub>) δ 173.9, 173.7, 172.6, 155.0, 143.4, 143.0, 139.9, 135.9, 131.0, 129.3, 129.2, 129.0, 128.7, 128.3, 127.9, 127.7, 127.4, 127.0, 124.9, 123.2, 122.1, 121.6, 108.1, 107.4, 80.0, 71.3, 65.6, 44.2, 28.3, 25.3; HRMS (TOF MS ESI<sup>+</sup>) calculated for C<sub>42</sub>H<sub>40</sub>N<sub>3</sub>O<sub>5</sub> [M+H]<sup>+</sup>: 666.2962, found 666.2965.

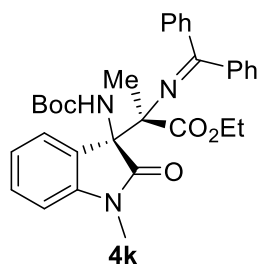

### Ethyl

**(*R*\*)-2-((*S*\*)-3-((*tert*-butoxycarbonyl)amino)-1-methyl-2-oxoindolin-3-yl)-2-((diphenylmethylene)amino)propanoate (4k).** 98.4 mg, 91%. Yellow solid; mp = 163.1-164.7 °C; <sup>1</sup>H NMR (500 MHz, CDCl<sub>3</sub>) δ 7.69 – 7.46 (m, 2H), 7.44 – 7.30 (comp, 6H), 7.28 – 7.19 (m, 2H), 7.12 – 7.01 (m, 2H), 7.00 – 6.89 (m, 1H), 6.84 – 6.70 (m, 1H), 6.68 – 6.27 (m, 1H), 4.01 – 3.57 (m, 2H), 3.21 (s, 3H), 1.42 – 0.91 (m, 15H); <sup>13</sup>C NMR (125 MHz, CDCl<sub>3</sub>) δ 174.8, 170.8, 169.1, 154.8, 144.9, 140.8, 137.5, 130.6, 129.1, 128.9, 128.6, 128.5, 128.1, 127.9, 124.1, 122.0, 107.4, 80.1, 70.7, 67.2, 61.4, 28.2, 26.4, 19.4, 13.7; HRMS (TOF MS ESI<sup>+</sup>) calculated for C<sub>32</sub>H<sub>36</sub>N<sub>3</sub>O<sub>5</sub> [M+H]<sup>+</sup>: 542.2649, found 542.2643.

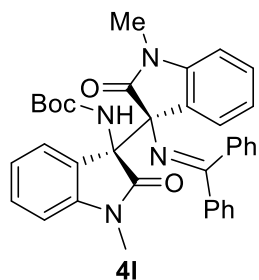

***tert*-Butyl-((3*S*\*,3'*S*\*)-3-((diphenylmethylene)amino)-1,1'-dimethyl-2,2'-dioxo-[3,3'-biindolin]-3'-yl)carbamate (4l).** 117.1 mg, 99%. Yellow solid; mp = 203.1-204.5 °C; <sup>1</sup>H NMR (500 MHz, CDCl<sub>3</sub>) δ 7.90 – 7.71 (m, 2H), 7.47 – 7.31 (comp, 3H), 7.24 – 6.48 (comp, 11H), 6.41 – 6.27 (m, 1H), 6.21 – 5.62 (m, 2H), 3.06 (s, 3H), 2.54 (s, 3H), 1.59 – 0.95 (m, 9H); <sup>13</sup>C NMR (125 MHz, CDCl<sub>3</sub>) δ 173.9, 173.6, 172.7, 154.8, 143.8, 143.0, 139.9, 136.1, 131.0, 129.3, 129.2, 129.0, 128.2, 127.7, 127.0, 124.3, 122.8, 121.8, 121.4, 107.4, 107.0, 79.9, 71.2, 65.8, 28.3, 25.8, 25.2; HRMS (TOF MS ESI<sup>+</sup>) calculated for C<sub>36</sub>H<sub>35</sub>N<sub>4</sub>O<sub>4</sub> [M+H]<sup>+</sup>: 587.2653, found 587.2655.



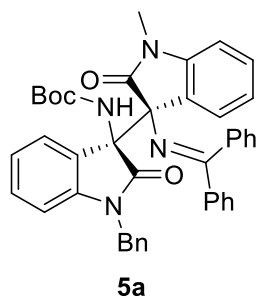

**tert-Butyl-((3*S*\*,3'*S*\*)-1'-benzyl-3-((diphenylmethylene)amino)-1-methyl-2,2'-dioxo-[3,3'-biindolin]-3'-yl)carbamate (5a).** 116.4 mg, 88%. Yellow solid; mp = 201.1-202.2 °C; <sup>1</sup>H NMR (500 MHz, CDCl<sub>3</sub>) δ 7.87 – 7.73 (m, 2H), 7.45 – 7.39 (m, 1H), 7.39 – 7.31 (comp, 4H), 7.30 – 7.10 (comp, 5H), 7.10 – 6.84 (comp, 6H), 6.83 – 6.56 (comp, 3H), 6.46 – 6.19 (m, 1H), 6.20 – 5.66 (m, 2H), 5.07 (s, 1H), 4.56 (s, 1H), 2.51 (s, 3H), 1.59 – 0.94 (M, 9H); <sup>13</sup>C NMR (125 MHz, CDCl<sub>3</sub>) δ 173.9, 173.7, 172.6, 155.0, 143.4, 143.0, 139.9, 135.9, 131.0, 129.3, 129.2, 129.0, 128.7, 128.3, 127.9, 127.7, 127.4, 127.0, 124.9, 123.2, 122.1, 121.6, 108.1, 107.4, 80.0, 71.3, 65.6, 44.2, 28.3, 25.3; HRMS (TOF MS ESI<sup>+</sup>) calculated for C<sub>42</sub>H<sub>39</sub>N<sub>4</sub>O<sub>4</sub> [M+H]<sup>+</sup>: 663.2966, found 663.2960.

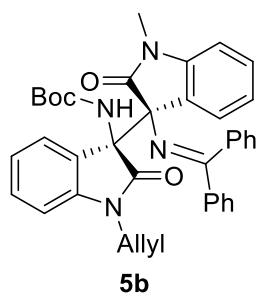

**tert-Butyl-((3*S*\*,3'*S*\*)-1'-allyl-3-((diphenylmethylene)amino)-1-methyl-2,2'-dioxo-[3,3'-biindolin]-3'-yl)carbamate (5b).** 120.1 mg, 98%. Yellow solid; mp = 201.3-202.4 °C; <sup>1</sup>H NMR (500 MHz, CDCl<sub>3</sub>) δ 7.87 – 7.72 (m, 2H), 7.46 – 7.39 (m, 1H), 7.38 – 7.31 (m, 2H), 7.24 – 7.07 (comp, 3H), 7.06 – 6.83 (comp, 5H), 6.83 – 6.53 (comp, 3H), 6.50 – 6.34 (m, 1H), 6.20 – 5.81 (m, 2H), 5.78 – 5.66 (m, 1H), 5.27 (d, *J* = 10.3 Hz, 1H), 5.15 (d, *J* = 10.3 Hz, 1H), 4.61 – 3.89 (m, 2H), 2.54 (s, 3H), 1.48 – 1.08 (M, 9H); <sup>13</sup>C NMR (125 MHz, CDCl<sub>3</sub>) δ 173.7, 173.3, 172.6, 154.8, 143.4, 143.0, 139.9, 136.0, 131.7, 131.0, 129.4, 129.2, 128.9, 128.2, 127.7, 127.0, 125.1, 123.2, 122.1, 121.4, 118.0, 108.0, 107.4, 79.9, 71.2, 65.6, 42.8, 28.3, 25.3; HRMS (TOF MS ESI<sup>+</sup>) calculated for C<sub>38</sub>H<sub>37</sub>N<sub>4</sub>O<sub>4</sub> [M+H]<sup>+</sup>: 613.2809, found 613.2795.

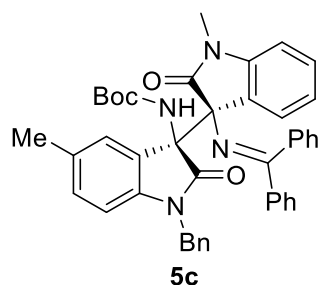

***tert*-Butyl-((3*S*\*,3'*S*\*)-1'-benzyl-3-((diphenylmethylene)amino)-1,5'-dimethyl-2,2'-dioxo-[3,3'-biindolin]-3'-yl)carbamate (**5c**). 132.1 mg, 97%. Yellow solid; mp = 193.2-194.8 °C; <sup>1</sup>H NMR (500 MHz, CDCl<sub>3</sub>) δ 7.91 – 7.74 (m, 2H), 7.49 – 7.18 (comp, 9H), 7.14 – 6.87 (comp, 6H), 6.83 – 6.53 (comp, 3H), 6.40 – 6.13 (m, 1H), 6.13 – 5.65 (m, 2H), 5.12 (s, 1H), 4.47 (s, 1H), 2.54 (s, 3H), 2.14 (s, 3H), 1.68 – 0.91 (m, 9H); <sup>13</sup>C NMR (125 MHz, CDCl<sub>3</sub>) δ 173.9, 173.7, 172.6, 155.0, 143.0, 140.9, 140.0, 136.03, 135.99, 131.0, 130.9, 129.2, 128.6, 128.2, 127.9, 127.7, 127.3, 127.0, 124.8, 124.1, 122.0, 107.8, 107.4, 79.9, 71.3, 65.6, 44.1, 28.4, 25.2, 21.1; HRMS (TOF MS ESI<sup>+</sup>) calculated for C<sub>43</sub>H<sub>41</sub>N<sub>4</sub>O<sub>4</sub> [M+H]<sup>+</sup>: 677.3122, found 677.3119.**

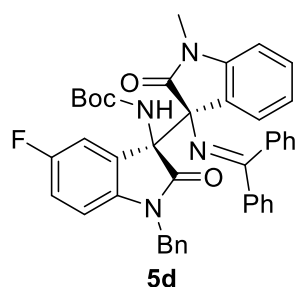

***tert*-Butyl-((3*S*\*,3'*S*\*)-1'-benzyl-3-((diphenylmethylene)amino)-5'-fluoro-1-methyl-2,2'-dioxo-[3,3'-biindolin]-3'-yl)carbamate (**5d**). 131.2 mg, 96%. Yellow solid; mp = 171.1-172.5 °C; <sup>1</sup>H NMR (500 MHz, CDCl<sub>3</sub>) δ 7.88 – 7.70 (m, 2H), 7.47 – 7.41 (m, 1H), 7.40 – 7.34 (m, 2H), 7.33 – 7.18 (comp, 6H), 7.17 – 7.02 (comp, 3H), 7.00 – 6.85 (comp, 3H), 6.82 – 6.50 (comp, 3H), 6.37 – 6.15 (m, 1H), 6.11 – 5.75 (m, 2H), 5.12 (s, 1H), 4.50 (s, 1H), 2.55 (s, 3H), 1.50 – 1.01 (m, 9H); <sup>13</sup>C NMR (125 MHz, CDCl<sub>3</sub>) δ 173.7, 173.5, 172.90, 158.8 (d, *J* = 238.8 Hz), 154.9, 142.9, 139.8, 139.4, 135.8, 135.6, 131.1, 129.5, 129.2, 128.7, 128.3, 127.8, 127.7, 127.5, 127.1, 124.9, 122.2, 115.1 (d, *J* = 22.5 Hz), 111.4 (d, *J* = 21.3 Hz), 108.6, 107.6, 80.3, 71.2, 65.8, 44.3, 28.4, 25.4; <sup>19</sup>F NMR (470 MHz, CDCl<sub>3</sub>) δ -121.9; HRMS (TOF MS ESI<sup>+</sup>) calculated for C<sub>42</sub>H<sub>38</sub>FN<sub>4</sub>O<sub>4</sub> [M+H]<sup>+</sup>: 681.2872, found 681.2864.**

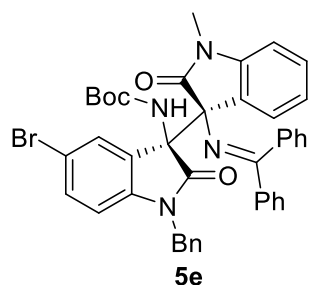

**tert-Butyl-((3S\*,3'S\*)-1'-benzyl-5'-bromo-3-((diphenylmethylene)amino)-1-methyl-2,2'-dioxo-[3,3'-biindolin]-3'-yl)carbamate (5e).** 142.0 mg, 96%. Yellow solid; mp = 197.1-198.3 °C; <sup>1</sup>H NMR (500 MHz, CDCl<sub>3</sub>) δ 7.88 – 7.72 (m, 2H), 7.46 – 7.41 (m, 1H), 7.40 – 7.12 (comp, 9H), 7.11 – 6.86 (comp, 6H), 6.82 – 6.54 (m, 2H), 6.27 – 6.11 (m, 1H), 6.09 – 5.71 (m, 2H), 5.14 (s, 1H), 4.42 (s, 1H), 2.60 (s, 3H), 1.59 – 1.03 (m, 9H); <sup>13</sup>C NMR (125 MHz, CDCl<sub>3</sub>) δ 173.6, 173.4, 173.1, 154.9, 142.9, 142.4, 139.8, 135.9, 135.4, 131.6, 131.1, 129.5, 129.2, 128.7, 128.3, 127.9, 127.6, 127.3, 127.0, 126.4, 124.7, 122.1, 114.3, 109.6, 107.7, 80.3, 71.2, 65.6, 44.2, 28.4, 25.3; HRMS (TOF MS ESI<sup>+</sup>) calculated for C<sub>42</sub>H<sub>38</sub>BrN<sub>4</sub>O<sub>4</sub> [M+H]<sup>+</sup>: 741.2071, found 741.2062.

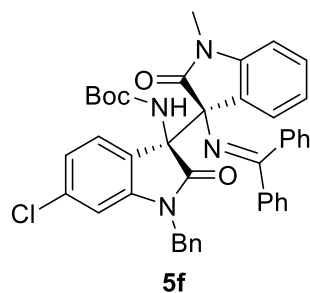

**tert-Butyl-((3S\*,3'S\*)-1'-benzyl-6'-chloro-3-((diphenylmethylene)amino)-1-methyl-2,2'-dioxo-[3,3'-biindolin]-3'-yl)carbamate (5f).** 138.0 mg, 99%. Yellow solid; mp = 181.1-182.5 °C; <sup>1</sup>H NMR (500 MHz, CDCl<sub>3</sub>) δ 7.86 – 7.70 (m, 2H), 7.50 – 7.40 (m, 1H), 7.39 – 7.17 (comp, 8H), 7.13 – 6.88 (comp, 6H), 6.84 – 6.56 (comp, 3H), 6.43 – 6.20 (m, 1H), 6.15 – 5.74 (m, 2H), 5.05 (s, 1H), 4.52 (s, 1H), 2.52 (s, 3H), 1.57 – 1.02 (m, 9H); <sup>13</sup>C NMR (125 MHz, CDCl<sub>3</sub>) δ 173.9, 173.6, 172.9, 154.9, 144.7, 142.9, 139.8, 135.9, 135.3, 134.6, 131.1, 129.6, 129.2, 128.8, 128.3, 127.8, 127.6, 127.5, 127.1, 124.8, 124.2, 122.3, 121.6, 108.8, 107.7, 80.3, 71.1, 65.3, 44.3, 28.4, 25.4; HRMS (TOF MS ESI<sup>+</sup>) calculated for C<sub>42</sub>H<sub>38</sub>ClN<sub>4</sub>O<sub>4</sub> [M+H]<sup>+</sup>: 697.2576, found 697.2558.

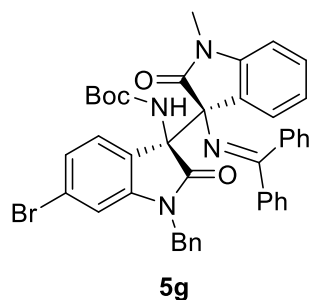

**tert-Butyl-((3S\*,3'S\*)-1'-benzyl-6'-bromo-3-((diphenylmethylene)amino)-1-methyl-2,2'-dioxo-[3,3'-biindolin]-3'-yl)carbamate (5g).** 146.0 mg, 98%. Yellow solid; mp = 192.1-192.3 °C; <sup>1</sup>H NMR (500 MHz, CDCl<sub>3</sub>) δ 7.88 – 7.67 (m, 2H), 7.49 – 7.18 (comp, 9H), 7.15 – 6.85 (comp, 7H), 6.82 – 6.60 (m, 2H), 6.57 – 6.35 (m, 1H), 6.29 – 5.73 (m, 2H), 5.05 (s, 1H), 4.52 (s, 1H), 2.52 (s, 3H), 1.55 – 1.07 (m, 9H); <sup>13</sup>C NMR (125 MHz, CDCl<sub>3</sub>) δ 173.8, 173.5, 172.8, 154.9, 144.9, 142.9, 139.8, 135.8, 135.3, 131.1, 129.6, 129.2, 128.8, 128.3, 127.8, 127.6, 127.5, 127.1, 124.8, 124.5, 122.6, 122.3, 111.6, 107.7, 80.3, 71.0, 65.3, 44.3, 28.4, 25.4; HRMS (TOF MS ESI<sup>+</sup>) calculated for C<sub>42</sub>H<sub>38</sub>BrN<sub>4</sub>O<sub>4</sub> [M+H]<sup>+</sup>: 741.2071, found 741.2060.

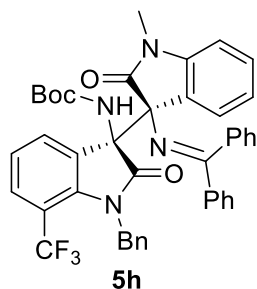

**tert-Butyl-((3S\*,3'S\*)-1'-benzyl-3-((diphenylmethylene)amino)-1-methyl-2,2'-dioxo-7'-(trifluoromethyl)-[3,3'-biindolin]-3'-yl)carbamate (5h).** 121.8 mg, 83%. Yellow solid; mp = 211.0-212.1 °C; <sup>1</sup>H NMR (500 MHz, CDCl<sub>3</sub>) δ 7.86 – 7.69 (m, 2H), 7.56 – 7.31 (comp, 6H), 7.29 – 7.14 (comp, 5H), 7.13 – 6.94 (comp, 5H), 6.92 – 6.60 (comp, 3H), 6.30 – 5.72 (m, 2H), 5.41 (s, 1H), 4.76 (s, 1H), 2.51 (s, 3H), 1.51 – 1.06 (m, 9H); <sup>13</sup>C NMR (125 MHz, CDCl<sub>3</sub>) δ 175.0, 173.4, 173.1, 155.0, 142.6, 141.3, 139.7, 136.2, 135.9, 131.2, 129.7, 129.2, 128.3, 128.2, 127.9, 127.1, 126.6, 126.3, 124.5, 124.4, 122.2, 120.7, 111.7 (q, *J* = 32.5 Hz), 107.6, 80.4, 71.7, 64.5, 45.9, 28.4, 25.3; <sup>19</sup>F NMR (376 MHz, CDCl<sub>3</sub>) δ -54.7; HRMS (TOF MS ESI<sup>+</sup>) calculated for C<sub>43</sub>H<sub>38</sub>F<sub>3</sub>N<sub>4</sub>O<sub>4</sub> [M+H]<sup>+</sup>: 731.2840, found 731.2839.

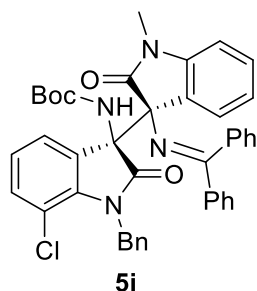

**tert-Butyl-((3*S*\*,3'*S*\*)-1'-benzyl-7'-chloro-3-((diphenylmethylene)amino)-1-methyl-1,2,2'-dioxo-[3,3'-biindolin]-3'-yl)carbamate (**5i**). 123.6 mg, 88%. Yellow solid; mp = 194.2-195.9 °C; <sup>1</sup>H NMR (500 MHz, CDCl<sub>3</sub>) δ 7.87 – 7.70 (m, 2H), 7.57 – 7.24 (comp, 8H), 7.22 – 6.89 (comp, 8H), 6.87 – 6.60 (comp, 3H), 6.36 – 5.72 (m, 2H), 5.45 (s, 1H), 5.00 (d, *J* = 15.9 Hz, 1H), 2.48 (s, 3H), 1.52 – 1.08 (m, 9H); <sup>13</sup>C NMR (125 MHz, CDCl<sub>3</sub>) δ 174.2, 172.8, 154.9, 142.8, 139.7, 139.4, 137.6, 135.8, 131.6, 131.1, 129.6, 129.1, 128.4, 128.3, 127.9, 127.2, 127.1, 126.9, 124.9, 122.3, 121.8, 114.4, 107.6, 80.3, 71.5, 65.4, 45.3, 28.4, 25.4; HRMS (TOF MS ESI<sup>+</sup>) calculated for C<sub>42</sub>H<sub>38</sub>ClN<sub>4</sub>O<sub>4</sub> [M+H]<sup>+</sup>: 697.2576, found 697.2556.**

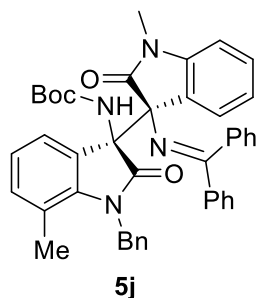

**tert-Butyl-((3*S*\*,3'*S*\*)-1'-benzyl-3-((diphenylmethylene)amino)-1,7'-dimethyl-2,2'-dioxo-[3,3'-biindolin]-3'-yl)carbamate (**5j**). 102.7 mg, 75%. Yellow solid; mp = 211.1-212.4 °C; <sup>1</sup>H NMR (500 MHz, CDCl<sub>3</sub>) δ 7.90 – 7.74 (m, 2H), 7.53 – 7.23 (comp, 8H), 7.21 – 7.09 (comp, 3H), 7.07 – 6.92 (comp, 4H), 6.90 – 6.49 (comp, 4H), 6.29 – 5.74 (m, 2H), 5.45 (s, 1H), 4.69 (s, 1H), 2.51 (s, 3H), 1.95 (s, 3H), 1.57 – 0.94 (m, 9H); <sup>13</sup>C NMR (125 MHz, CDCl<sub>3</sub>) δ 174.7, 173.6, 172.5, 155.1, 143.1, 141.3, 140.0, 137.9, 136.0, 133.0, 131.0, 129.4, 129.2, 128.7, 128.3, 127.8, 127.0, 126.9, 126.4, 124.8, 121.8, 121.6, 121.2, 118.5, 107.5, 80.0, 71.7, 65.3, 45.4, 28.4, 25.4, 18.6; HRMS (TOF MS CI<sup>+</sup>) calculated for C<sub>43</sub>H<sub>41</sub>N<sub>4</sub>O<sub>4</sub> [M+H]<sup>+</sup>: 677.3122, found 677.3114.**

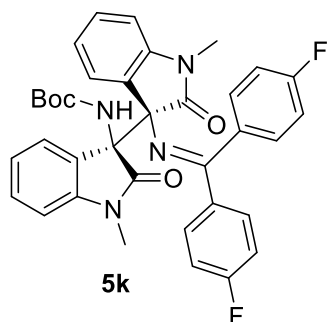

***tert*-Butyl-((3*S*\*,3'*S*'\*)-3-((bis(4-fluorophenyl)methylene)amino)-1,1'-dimethyl-2,2'-dioxo-[3,3'-biindolin]-3'-yl)carbamate (5k).** 108.0 mg, 87%. Yellow solid; mp = 204.2-205.8 °C; <sup>1</sup>H NMR (500 MHz, CDCl<sub>3</sub>) δ 7.84 – 7.72 (m, 2H), 7.18 – 6.86 (comp, 8H), 6.83 – 6.63 (comp, 3H), 6.54 – 6.28 (m, 2H), 6.14 – 5.75 (m, 2H), 3.07 (s, 3H), 2.62 (s, 3H), 1.44 – 1.06 (m, 9H); <sup>13</sup>C NMR (125 MHz, CDCl<sub>3</sub>) δ 173.9, 173.5, 170.6, 164.9 (d, *J* = 250.0 Hz), 162.0 (d, *J* = 247.5 Hz), 154.7, 143.7, 142.8, 136.1, 131.9 (d, *J* = 3.8 Hz), 131.4 (d, *J* = 10.0 Hz), 129.9, 129.6, 129.2, 127.5, 124.2, 122.7, 121.9, 121.4, 115.3 (d, *J* = 21.3 Hz), 114.2 (d, *J* = 21.3 Hz), 107.5, 107.2, 80.0, 71.1, 65.8, 28.3, 25.8, 25.3; <sup>19</sup>F NMR (470 MHz, CDCl<sub>3</sub>) δ -109.4, -112.5; HRMS (TOF MS ESI<sup>+</sup>) calculated for C<sub>36</sub>H<sub>33</sub>F<sub>2</sub>N<sub>4</sub>O<sub>4</sub> [M+H]<sup>+</sup>: 623.2464, found 623.2446.

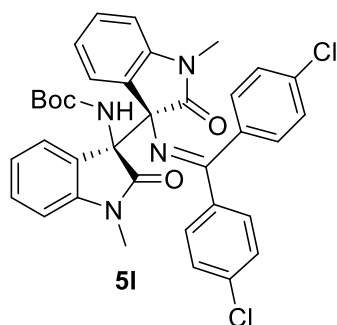

***tert*-Butyl-((3*S*\*,3'*S*'\*)-3-((bis(4-chlorophenyl)methylene)amino)-1,1'-dimethyl-2,2'-dioxo-[3,3'-biindolin]-3'-yl)carbamate (5l).** 120.9 mg, 92%. Yellow solid; mp = 195.2-196.4 °C; <sup>1</sup>H NMR (500 MHz, CDCl<sub>3</sub>) δ 7.81 – 7.64 (m, 2H), 7.39 – 7.30 (m, 2H), 7.25 – 6.88 (comp, 6H), 6.86 – 6.49 (comp, 4H), 6.41 – 6.28 (m, 1H), 6.07 – 6.00 (m, 1H), 5.99 – 5.69 (m, 1H), 3.07 (s, 3H), 2.60 (s, 3H), 1.45 – 1.01 (m, 9H); <sup>13</sup>C NMR (125 MHz, CDCl<sub>3</sub>) δ 173.8, 173.4, 170.4, 154.7, 143.7, 142.9, 138.0, 137.6, 134.2, 134.1, 130.5, 129.7, 129.2, 128.6, 127.4, 127.3, 124.3, 122.7, 122.0, 121.5, 107.5, 107.2, 80.1, 71.1, 65.7, 28.3, 25.9, 25.2; HRMS (TOF MS ESI<sup>+</sup>) calculated for C<sub>36</sub>H<sub>33</sub>Cl<sub>2</sub>N<sub>4</sub>O<sub>4</sub> [M+H]<sup>+</sup>: 655.1873, found 655.1858.

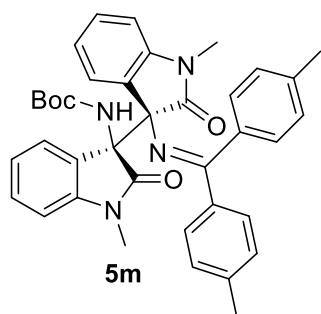

***tert*-Butyl-((3*S*\*,3'*S*'\*)-3-((di-*p*-tolylmethylene)amino)-1,1'-dimethyl-2,2'-dioxo-[3,3'-biindolin]-3'-yl)carbamate (**5m**). 104.5 mg, 85%. Yellow solid; mp = 184.2-185.6 °C; <sup>1</sup>H NMR (500 MHz, CDCl<sub>3</sub>) δ 7.76 – 7.58 (m, 2H), 7.22 – 7.04 (comp, 4H), 7.03 – 6.83 (comp, 4H), 6.82 – 6.13 (comp, 5H), 6.11 – 5.66 (m, 2H), 3.06 (s, 3H), 2.53 (s, 3H), 2.36 (s, 3H), 2.18 (s, 3H), 1.42 – 0.99 (m, 9H); <sup>13</sup>C NMR (125 MHz, CDCl<sub>3</sub>) δ 173.9, 173.6, 172.8, 154.9, 143.8, 143.0, 141.2, 137.6, 137.3, 133.5, 129.3, 129.2, 129.0, 128.9, 128.0, 127.4, 124.4, 122.9, 121.7, 121.3, 107.2, 107.0, 79.8, 71.2, 65.8, 28.3, 25.8, 25.1, 21.6, 21.2; HRMS (TOF MS ESI<sup>+</sup>) calculated for C<sub>38</sub>H<sub>39</sub>N<sub>4</sub>O<sub>4</sub> [M+H]<sup>+</sup>: 615.2966, found 615.2950.**

### Control Experiment

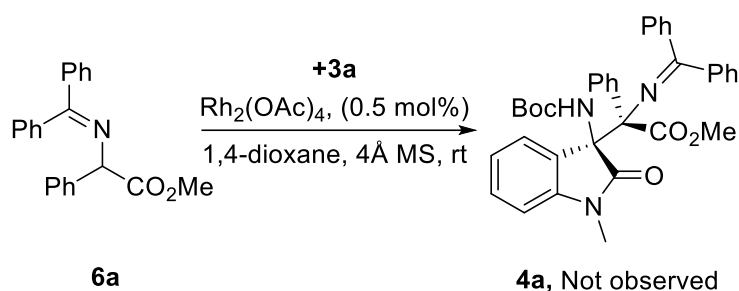

To a 10-mL oven-dried vial containing a magnetic stirring bar, **3a** (26.0 mg, 0.10 mmol), 4 Å MS (25.0 mg) and Rh<sub>2</sub>(OAc)<sub>4</sub> (0.2 mg, 0.5 mol%) in 1,4-dioxane (2.0 mL), was added compound **6a** (39.5 mg, 0.12 mmol) in 1,4-dioxane (1.0 mL) at room temperature under argon atmosphere. The resulting reaction mixture was stirred at room temperature for 36 h. Then the reaction mixture was subjected to proton NMR analysis in CDCl<sub>3</sub> after the solvent was evaporated, and **4a** was not observed (see Figure S1, the second spectrum).

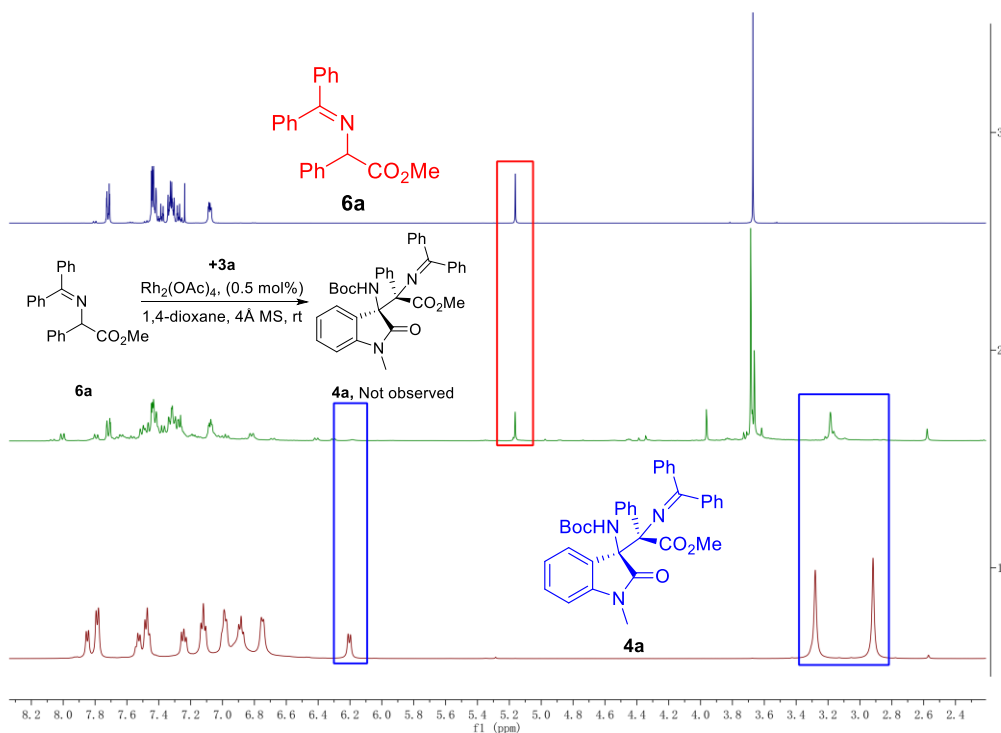

**Figure S1.** Proton NMR spectrum of crude reaction mixture of **6a** with **3a** under standard conditions

### General Procedure for Scale Up

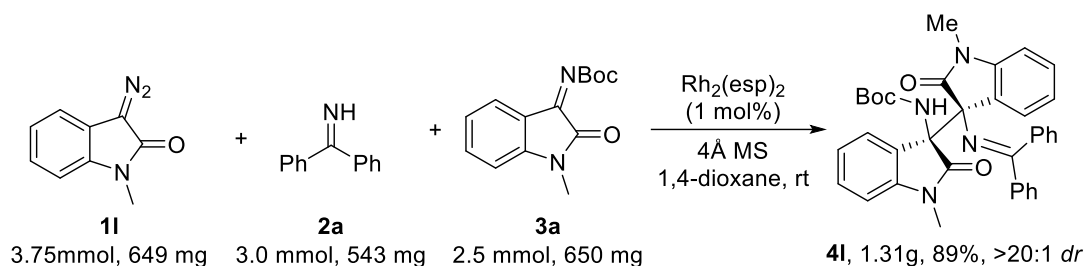

To a 50-mL oven-dried round-bottom flask with a magnetic stirring bar,  $\text{Rh}_2(\text{esp})_2$  (19.1 mg, 1.0 mol%), 4Å MS (250.0 mg), benzophenone imines **2a** (543.3 mg, 3.0 mmol) and isatin-derived ketimines **3a** (650.3 mg, 2.5 mmol) in 1,4-dioxane (15.0 mL), was added diazo compound **11** (648.9 mg, 3.75 mmol) in 1,4-dioxane (10.0 mL) *via* a syringe pump for 2 h at room temperature under argon atmosphere. The resulting reaction mixture was stirred at room temperature for 48 h. When the reaction was completed (monitored by TLC), the solvent was evaporated in *vacuo* and the residue was purified by flash column chromatography on silica gel with additional treatment (Hexanes: EtOAc = 5:1 to 3:1) to afford 1.31 g pure product **4i** in 89% yield with >20:1 *dr*.



## Derivatization

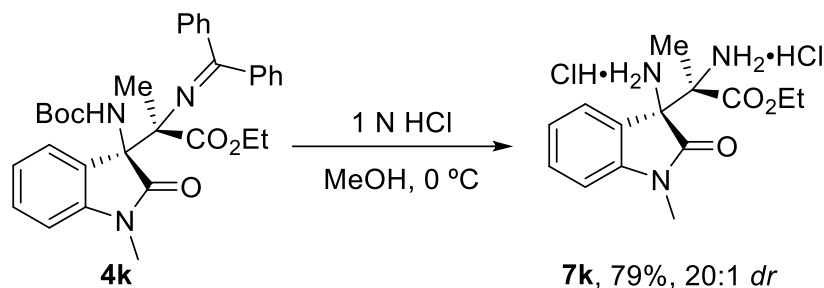

**Synthesis of 7k:** To a 10-mL oven-dried vial with a magnetic stirring bar, **4k** (74.0 mg, 0.14 mmol) in MeOH (3.0 mL), was added 1 N HCl (0.5 mL) slowly at 0 °C. Then the reaction solution was stirred for 3 minutes at 0 °C. After the completion of the reaction (monitored by TLC), the reaction solution was evaporated in vacuo and the residue was filtered off and washed twice with methanol to give 38.0 mg of pure product **7k** as white solid, 79% yield;  $^1\text{H}$  NMR (500 MHz, DMSO)  $\delta$  7.71 – 7.66 (m, 1H), 7.54 – 7.49 (m, 1H), 7.23 – 7.15 (m, 2H), 4.21 – 4.11 (m, 2H), 3.16 (s, 3H), 1.62 (s, 3H), 1.14 (t,  $J = 7.0$  Hz, 3H);  $^{13}\text{C}$  NMR (125 MHz, DMSO)  $\delta$  170.5, 167.1, 144.0, 131.8, 128.7, 126.8, 123.1, 109.8, 63.5, 62.5, 61.8, 26.9, 17.8, 13.6; HRMS (TOF MS ESI $^+$ ) calculated for  $\text{C}_{14}\text{H}_{20}\text{N}_3\text{O}_3$   $[\text{M}+\text{H}]^+$ : 278.1499, found 278.1507.

## References:

- 1 J. Yang, P. Ruan, W. Yang, X. Feng and X. Liu, Enantioselective carbene insertion into the N-H bond of benzophenone imine. *Chem. Sci.*, 2019, **10**, 10305-10309.
- 2 R. He, Z. Huang, Q. Zheng and C. Wang, Manganese-catalyzed dehydrogenative [4+2] annulation of N-H imines and alkynes by C-H/N-H activation. *Angew. Chem. Int. Ed.*, 2014, **53**, 4950-4953.
- 3 W. Yan, D. Wang, J. Feng, P. Li, D. Zhao and R. Wang, Synthesis of *N*-alkoxycarbonyl ketimines derived from isatins and their application in enantioselective synthesis of 3-aminoxindoles. *Org. Lett.*, 2012, **14**, 2512-2515.

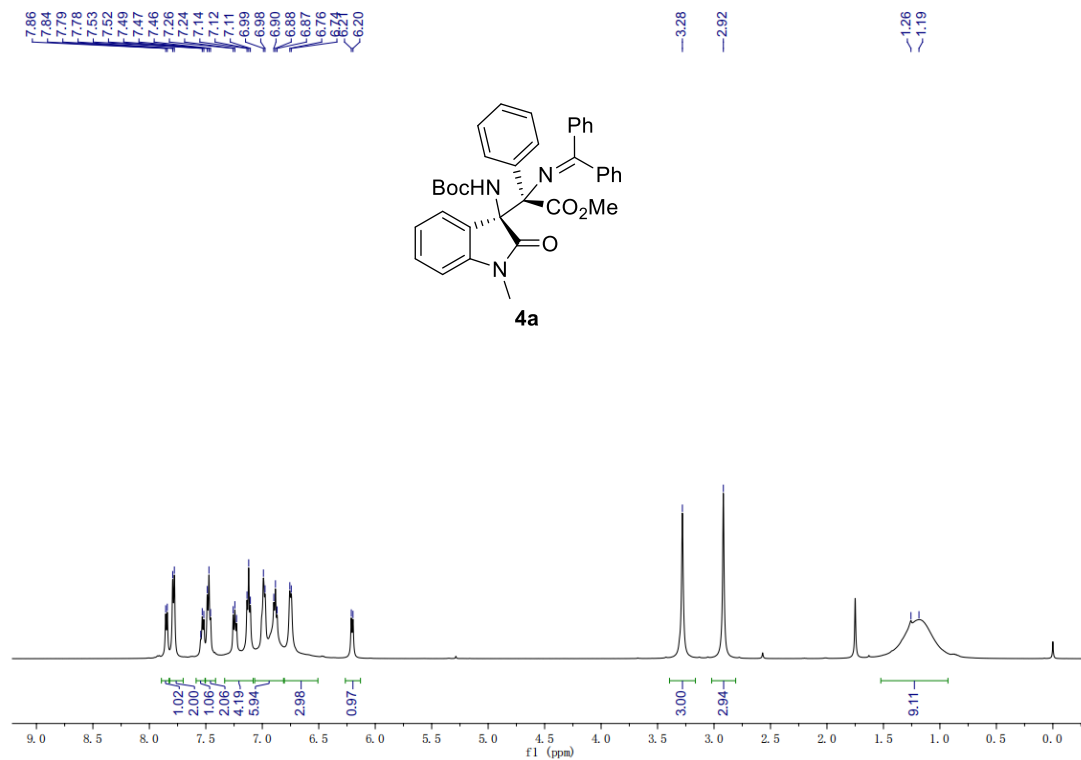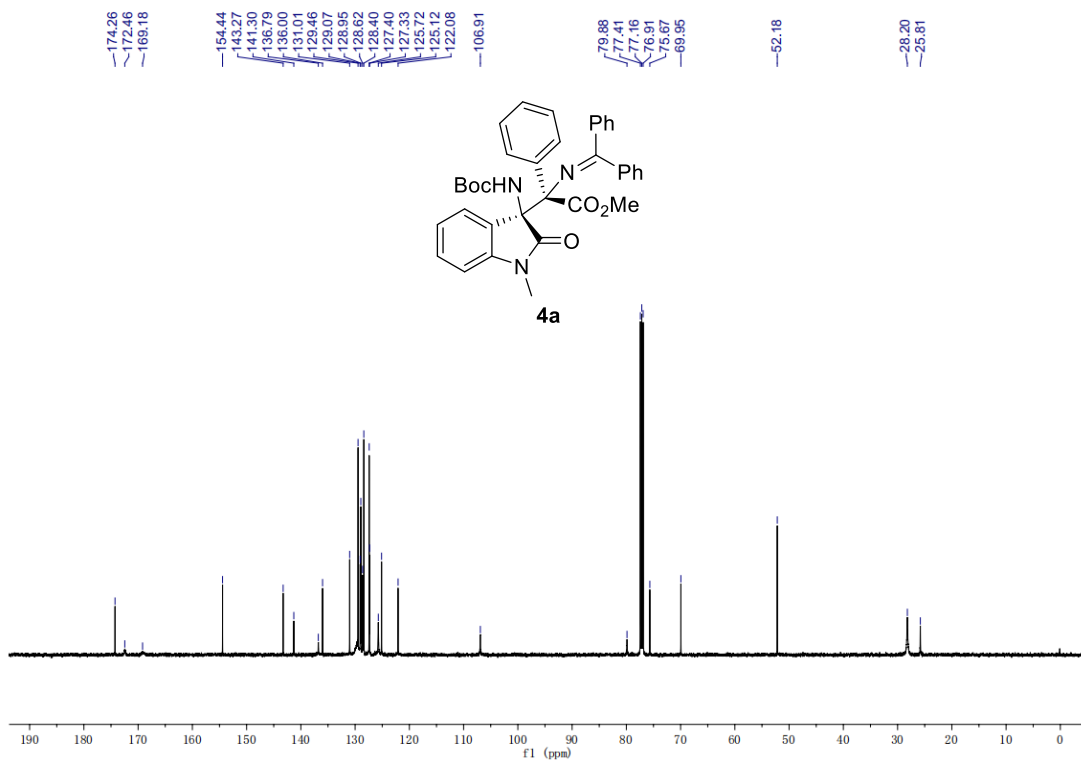

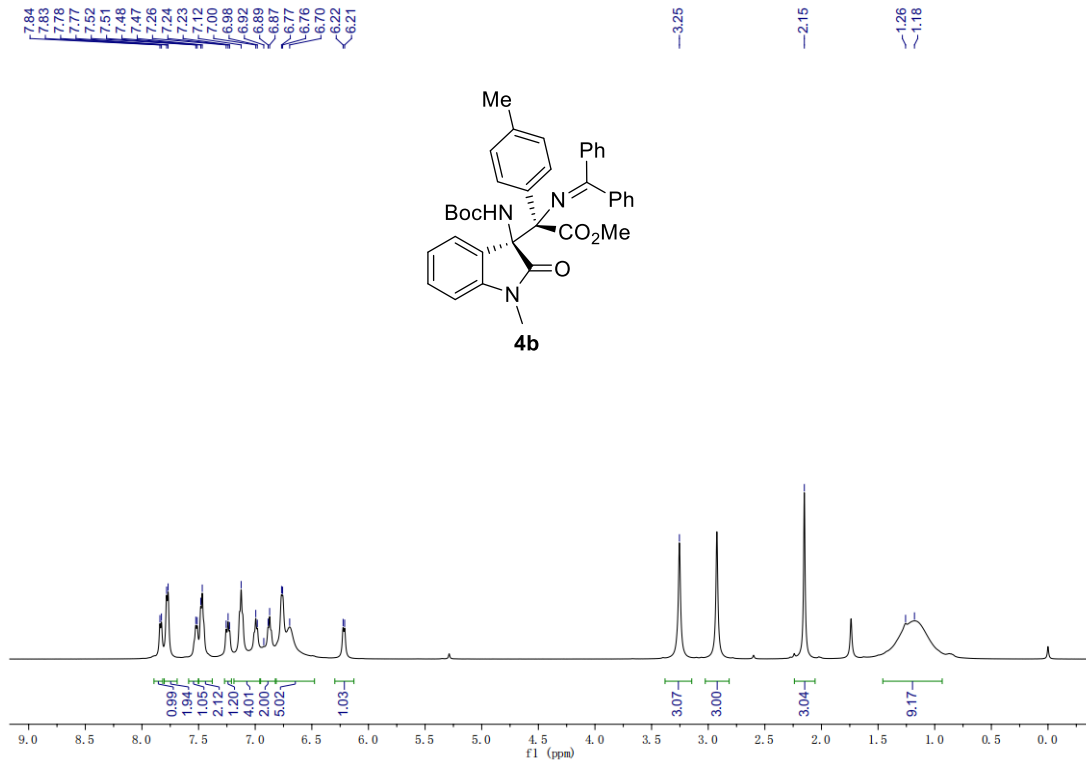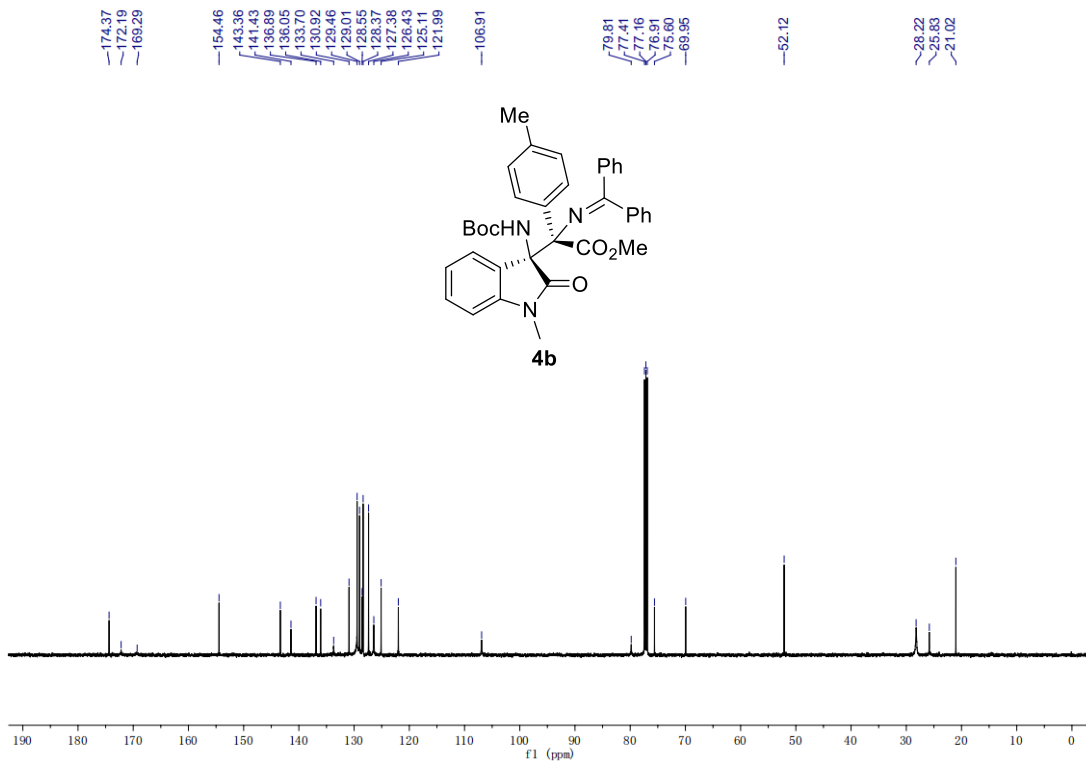

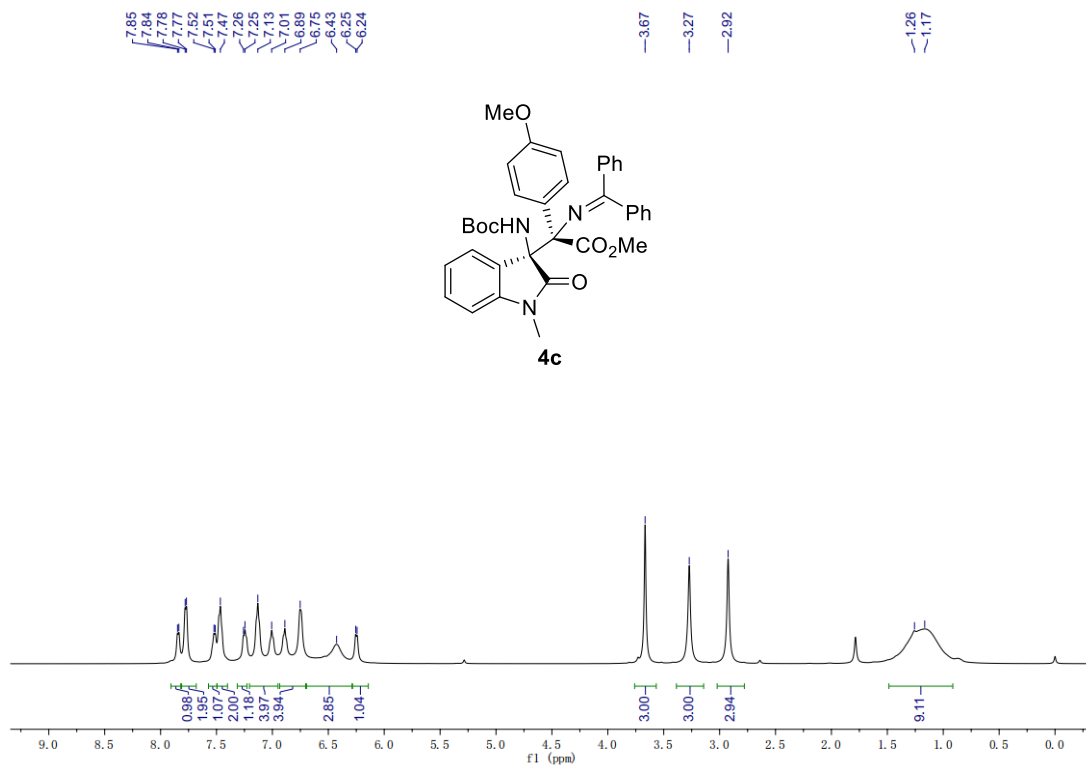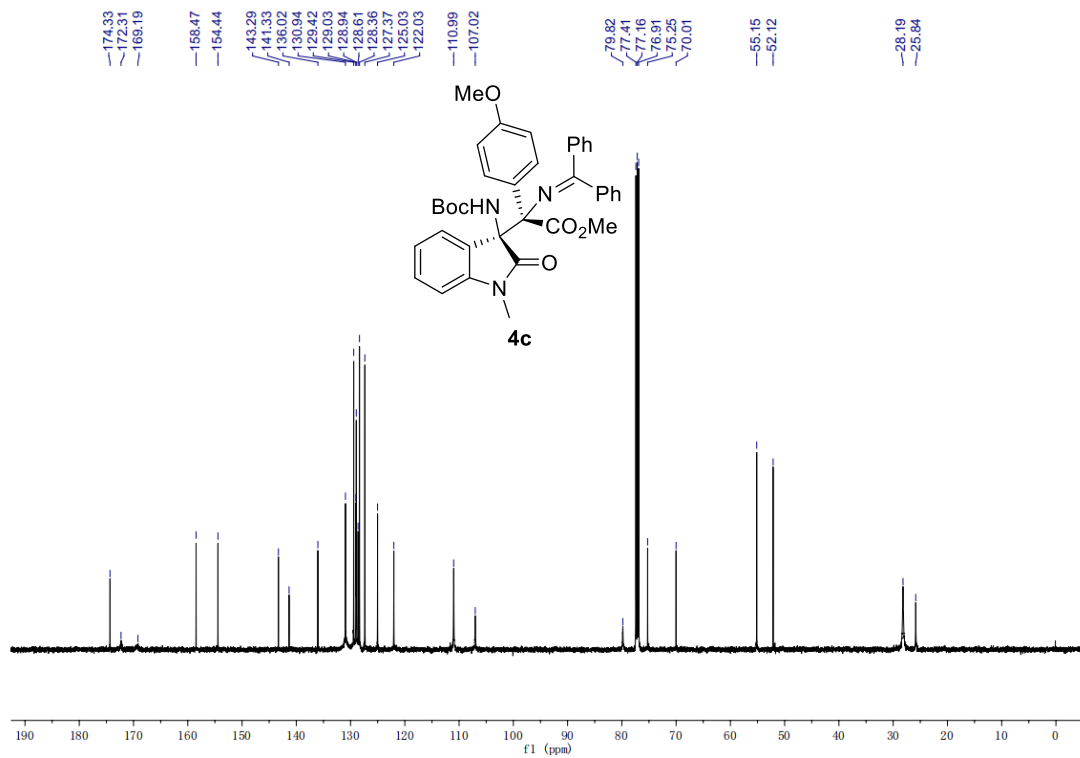

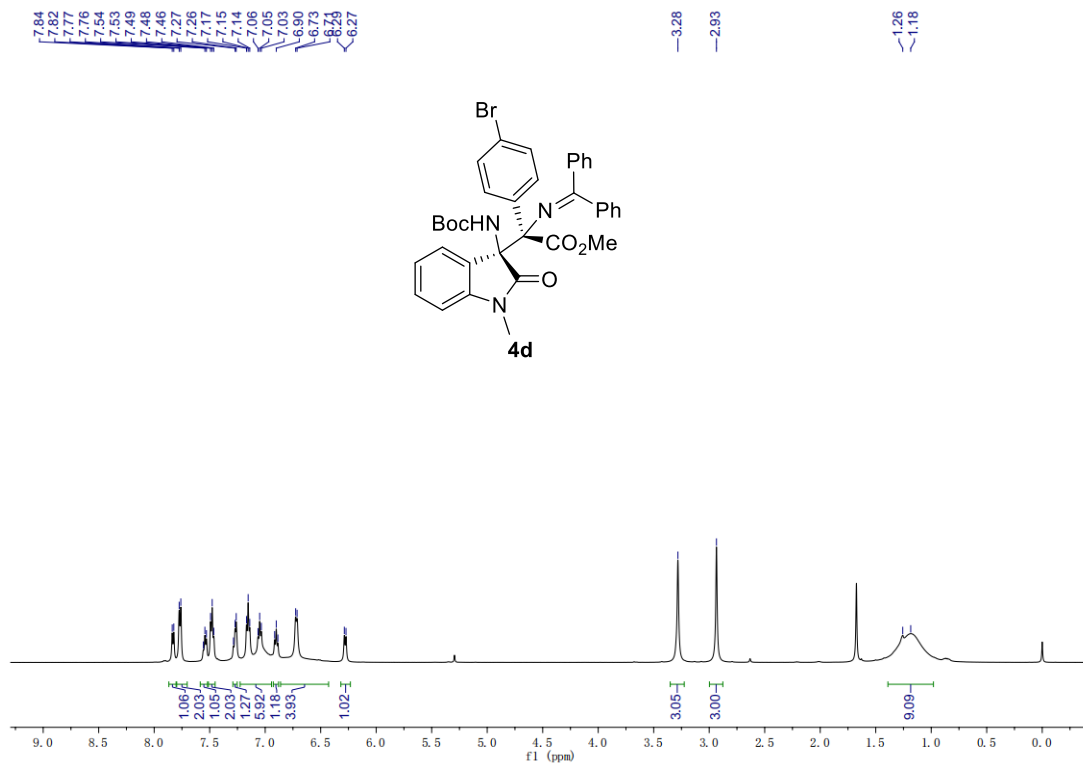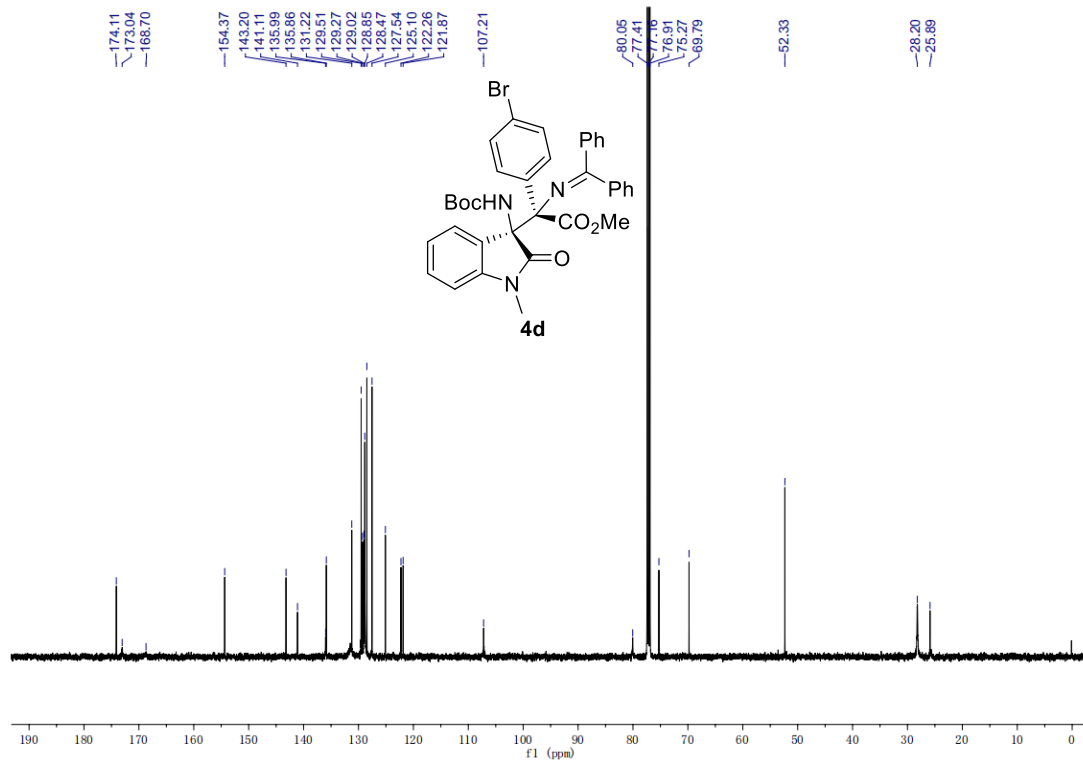

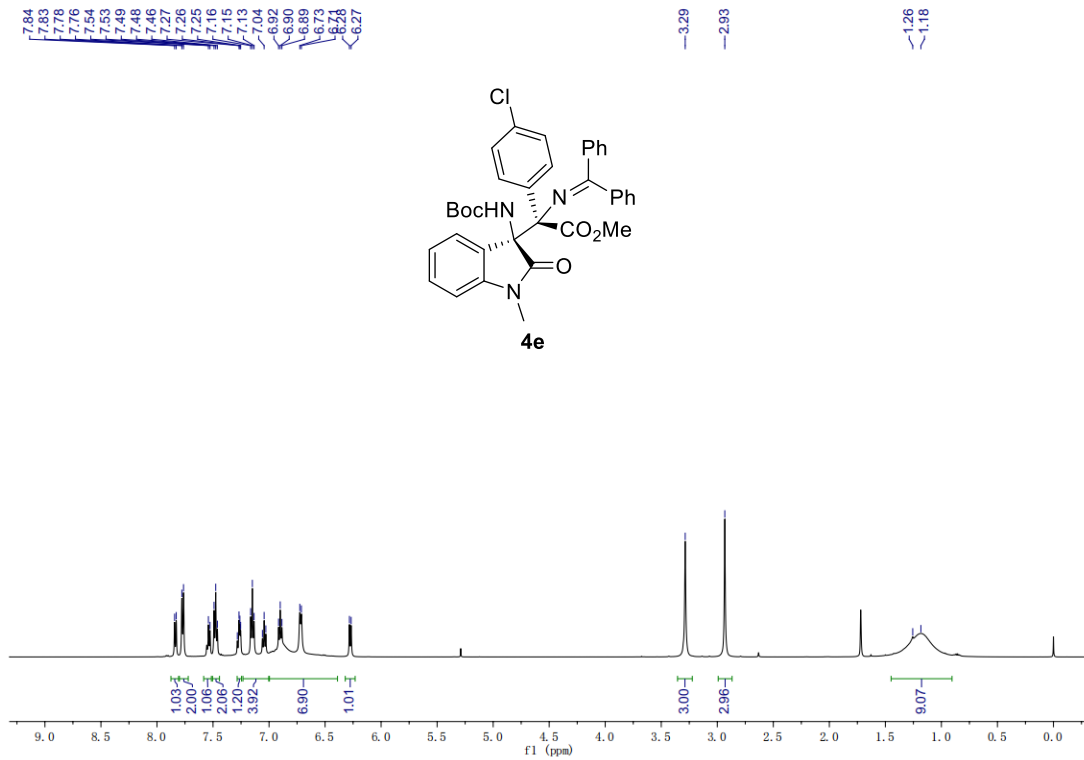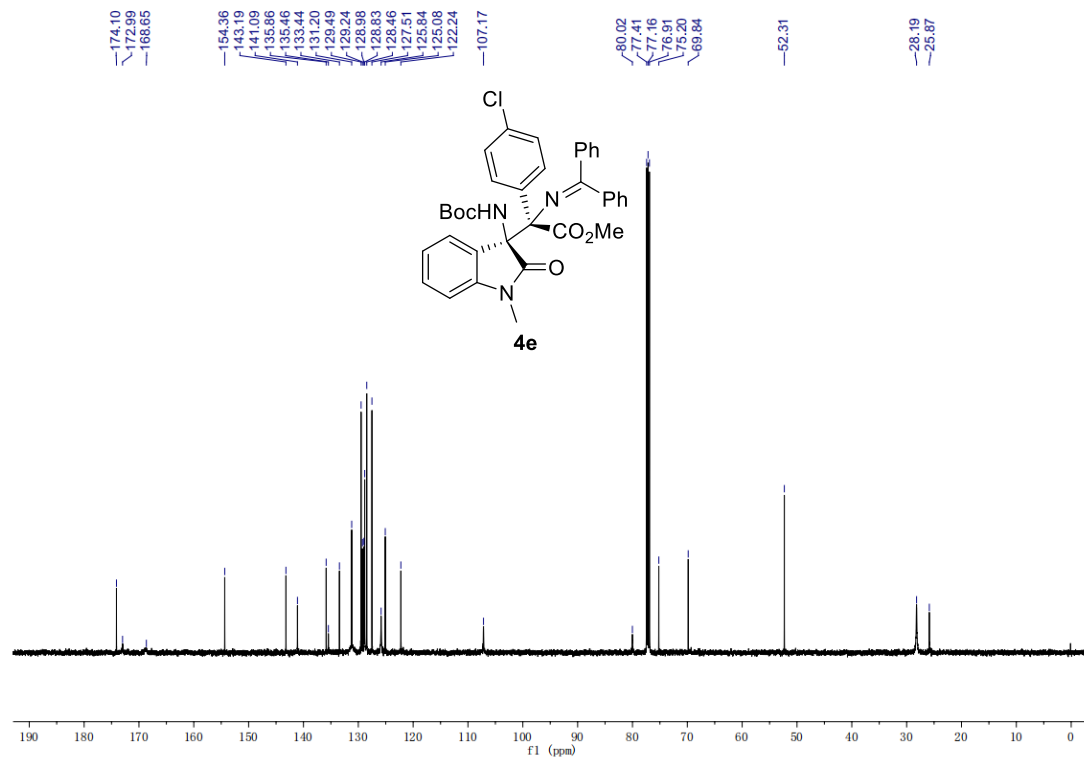

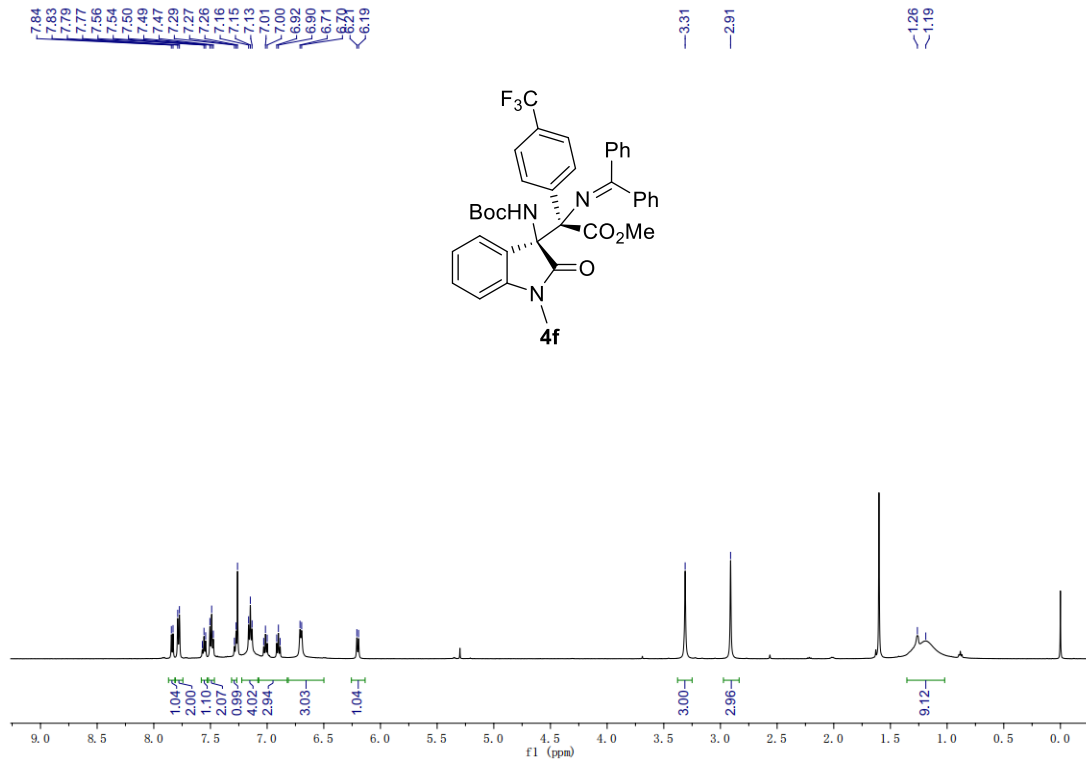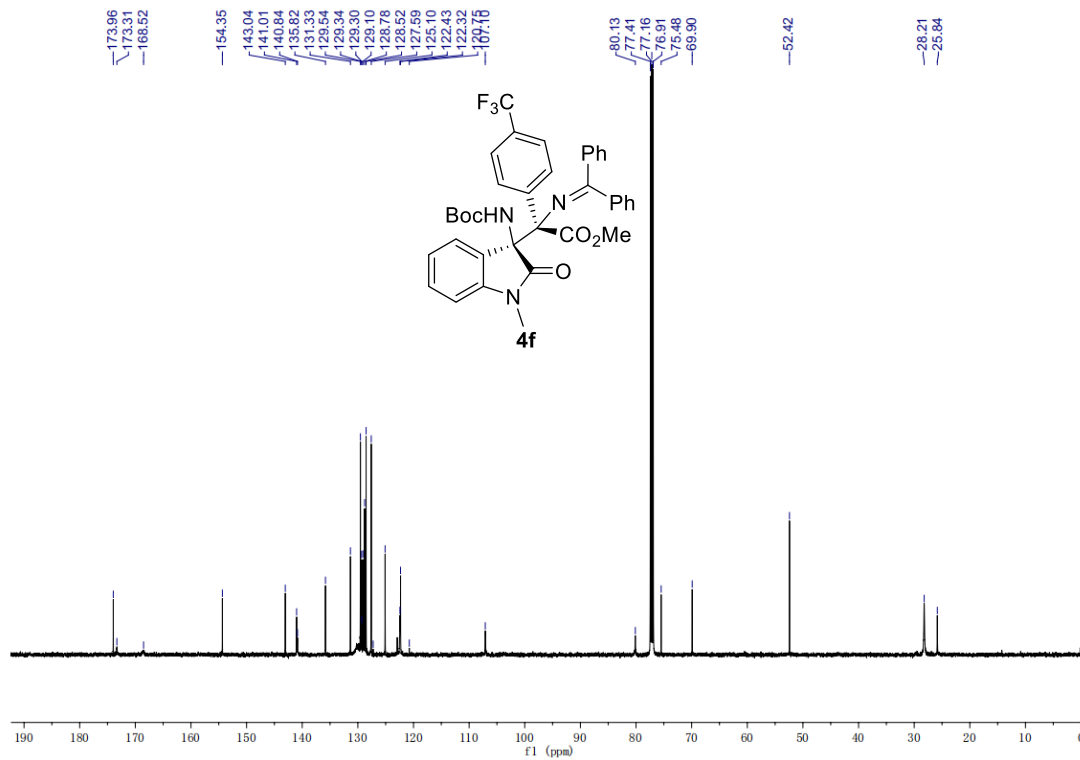

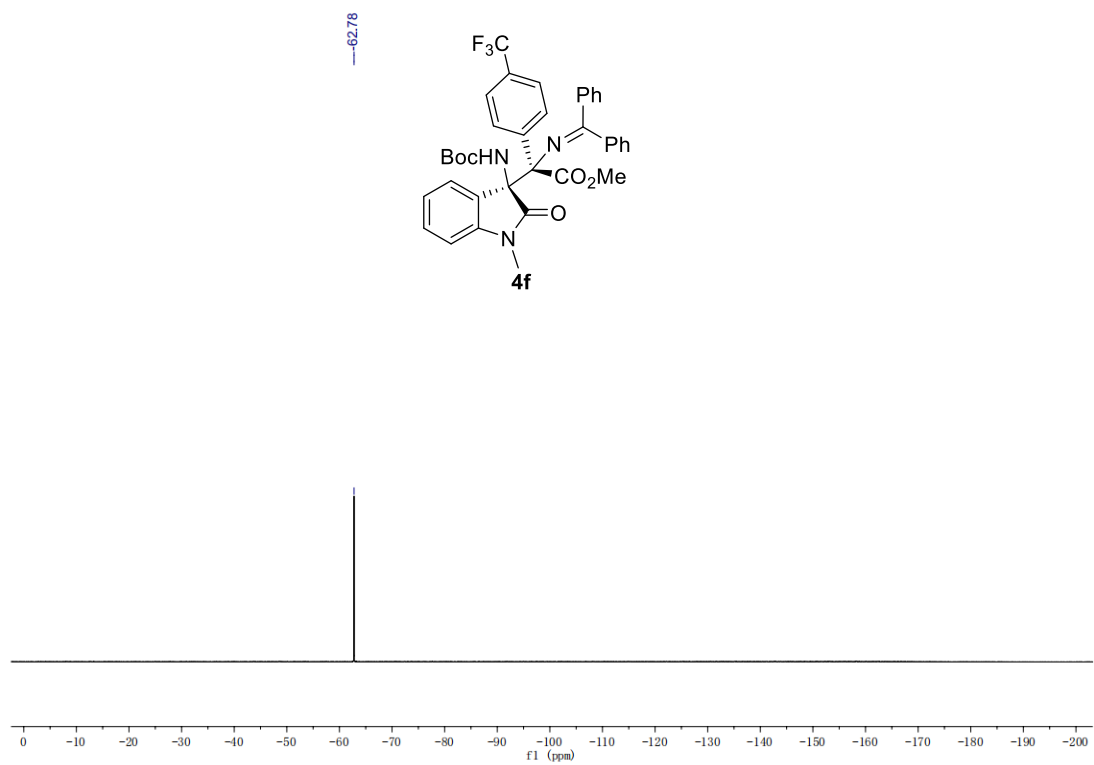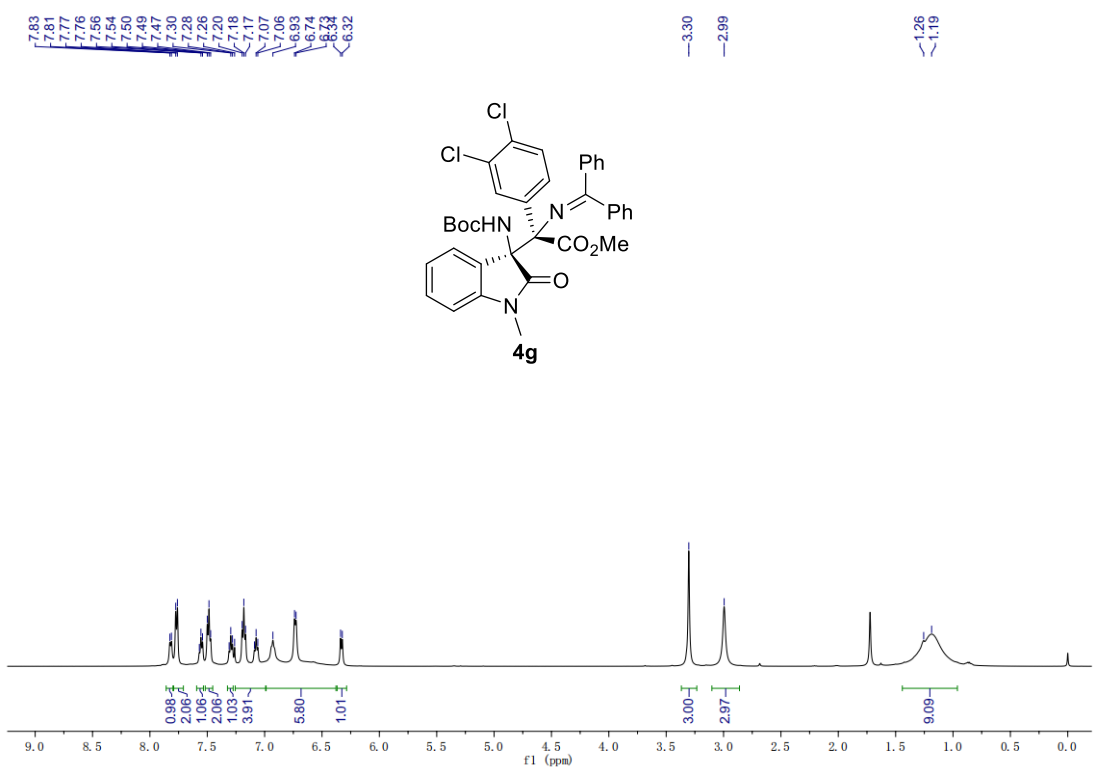



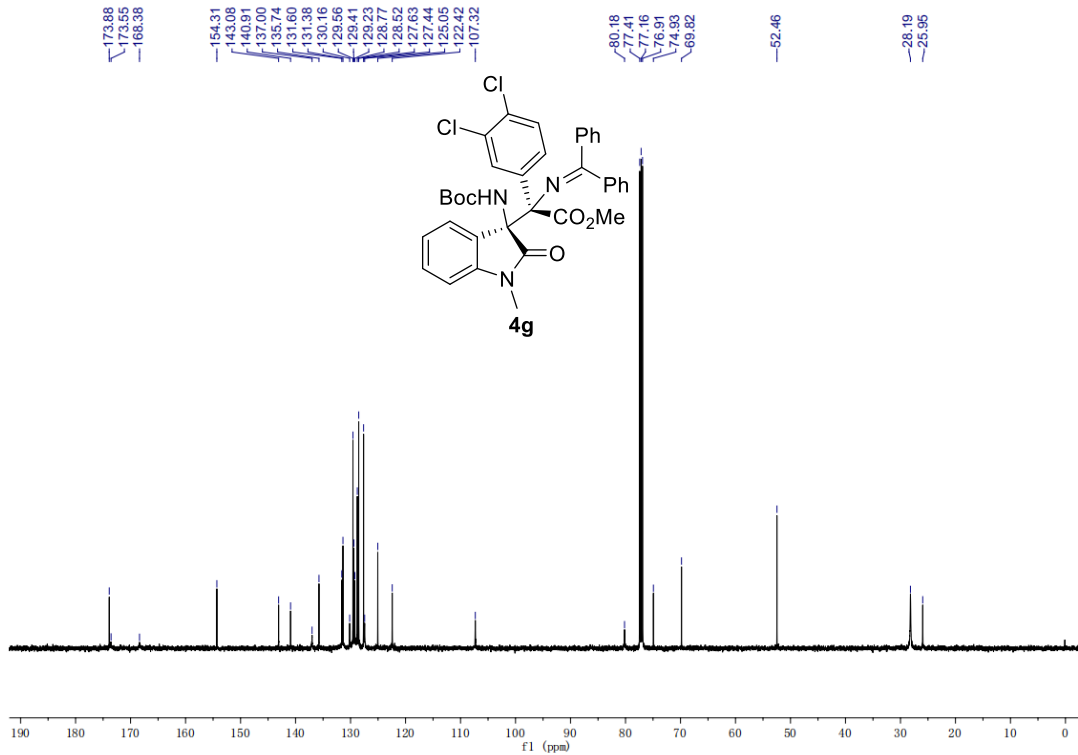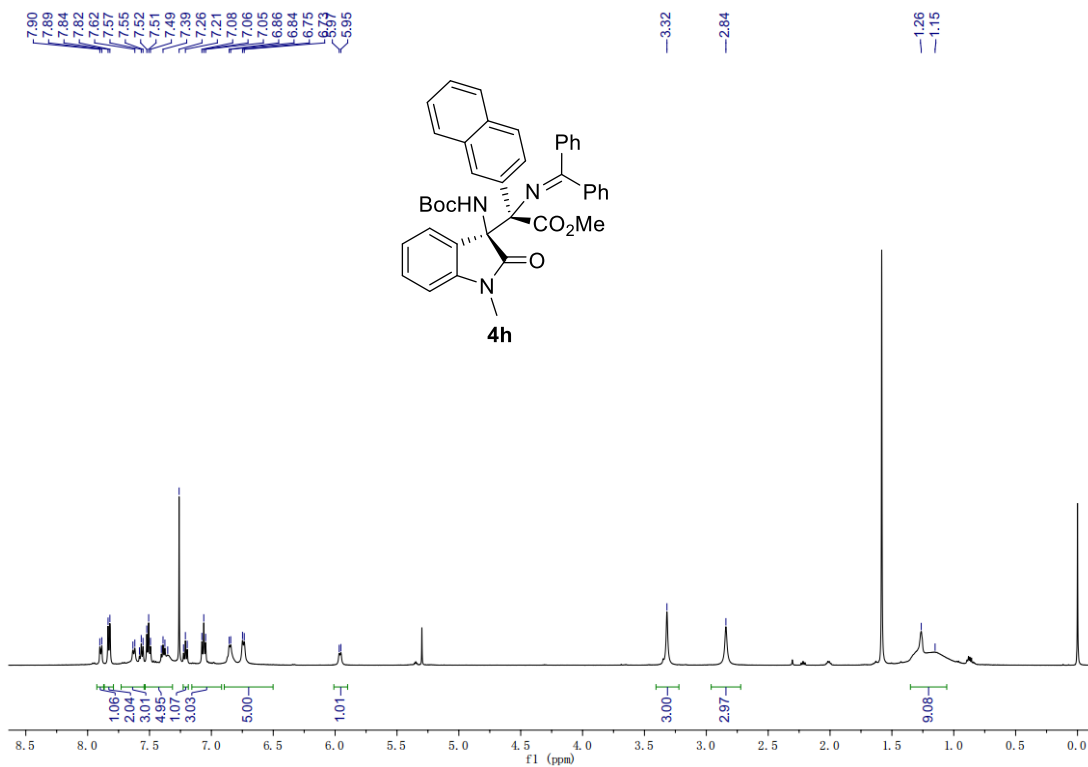

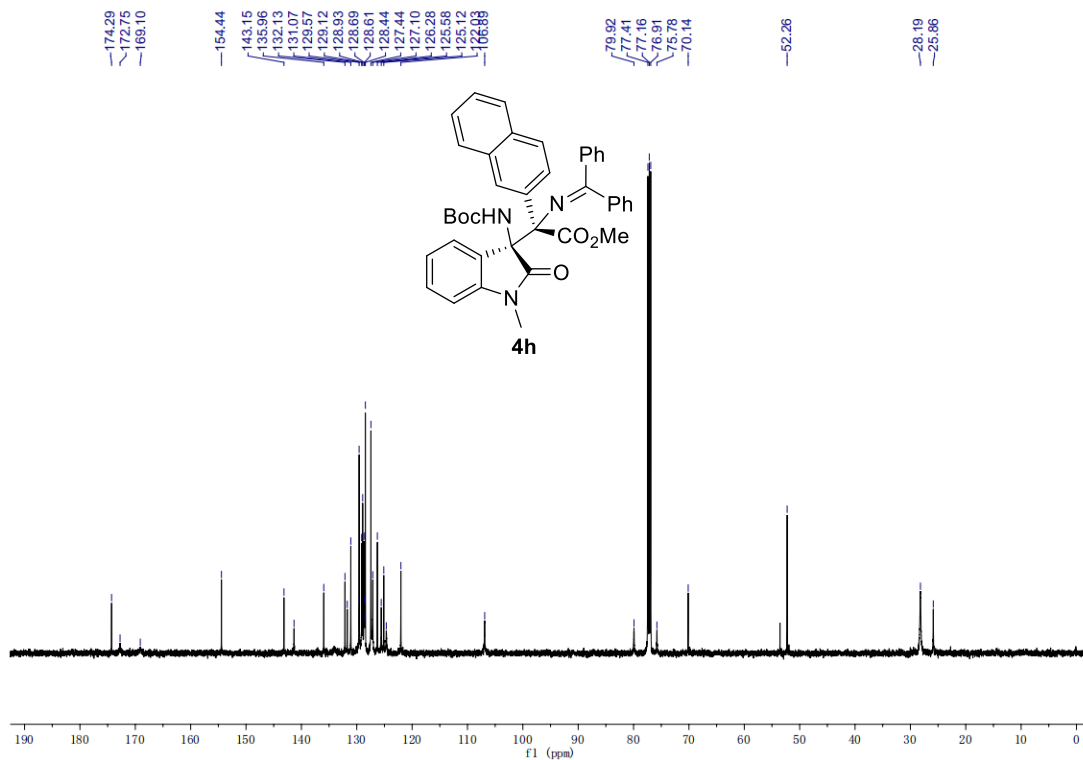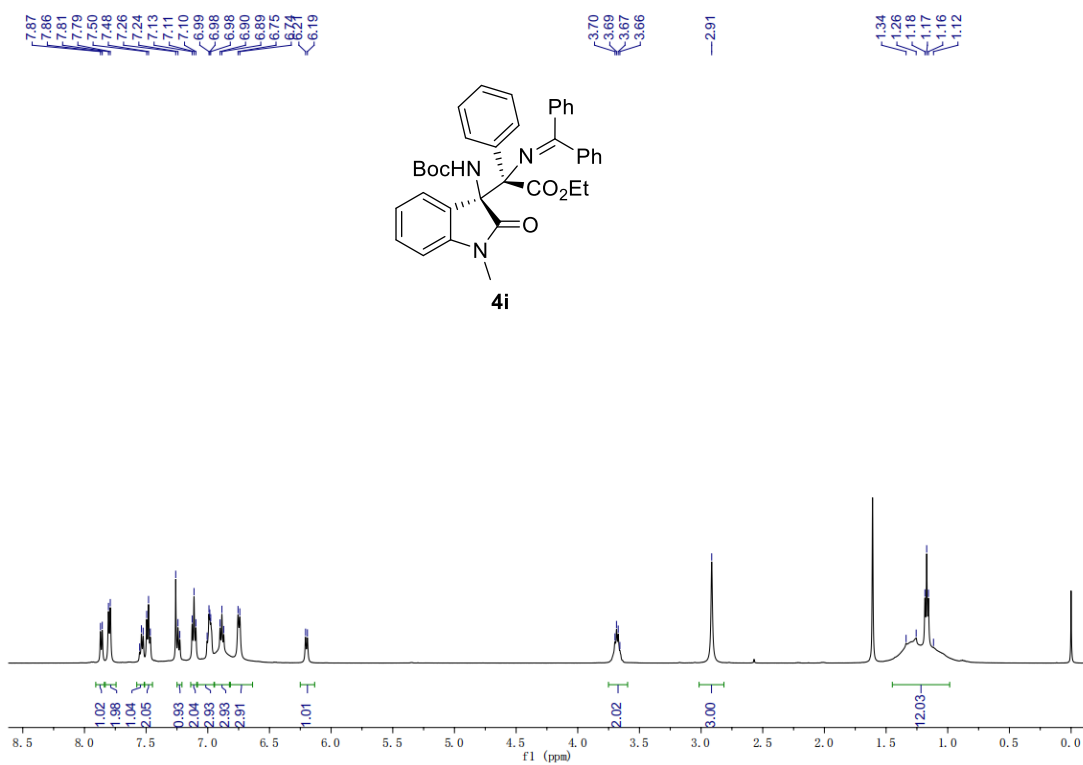

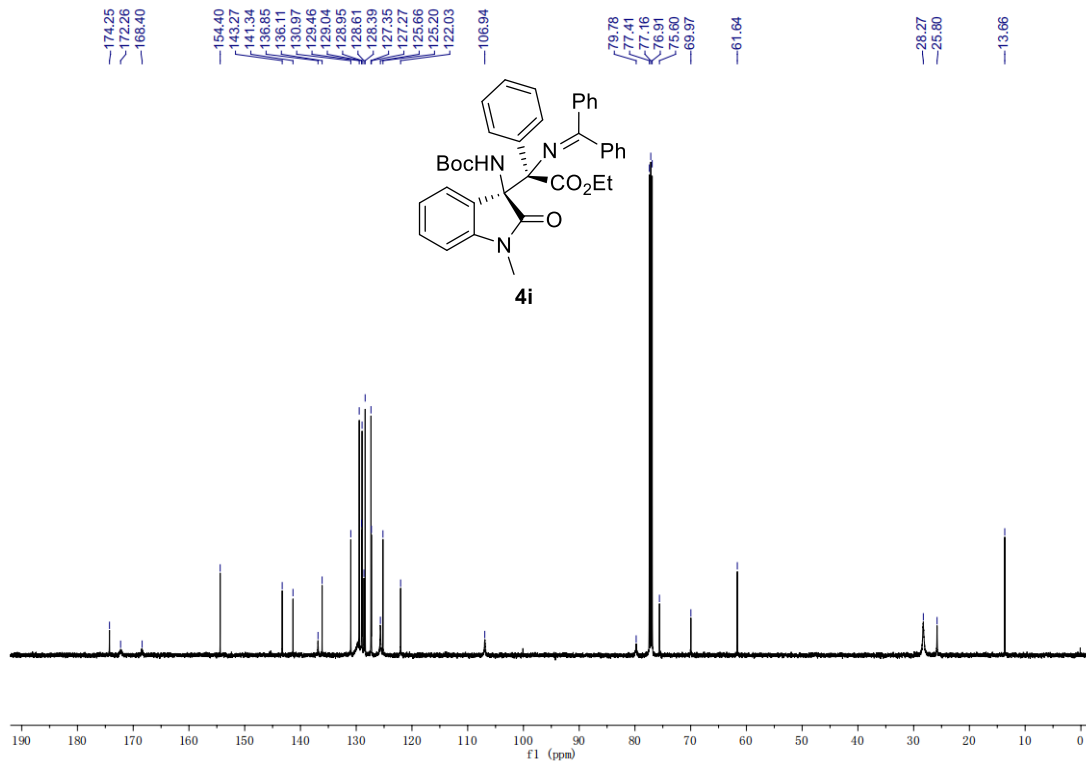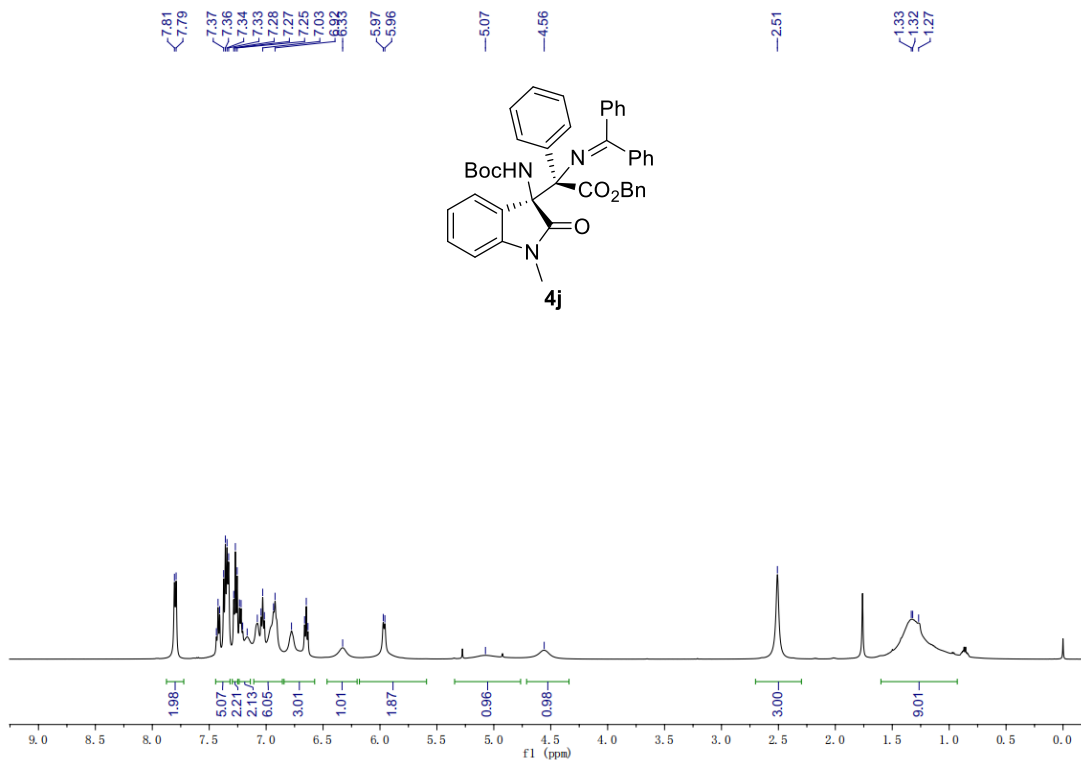



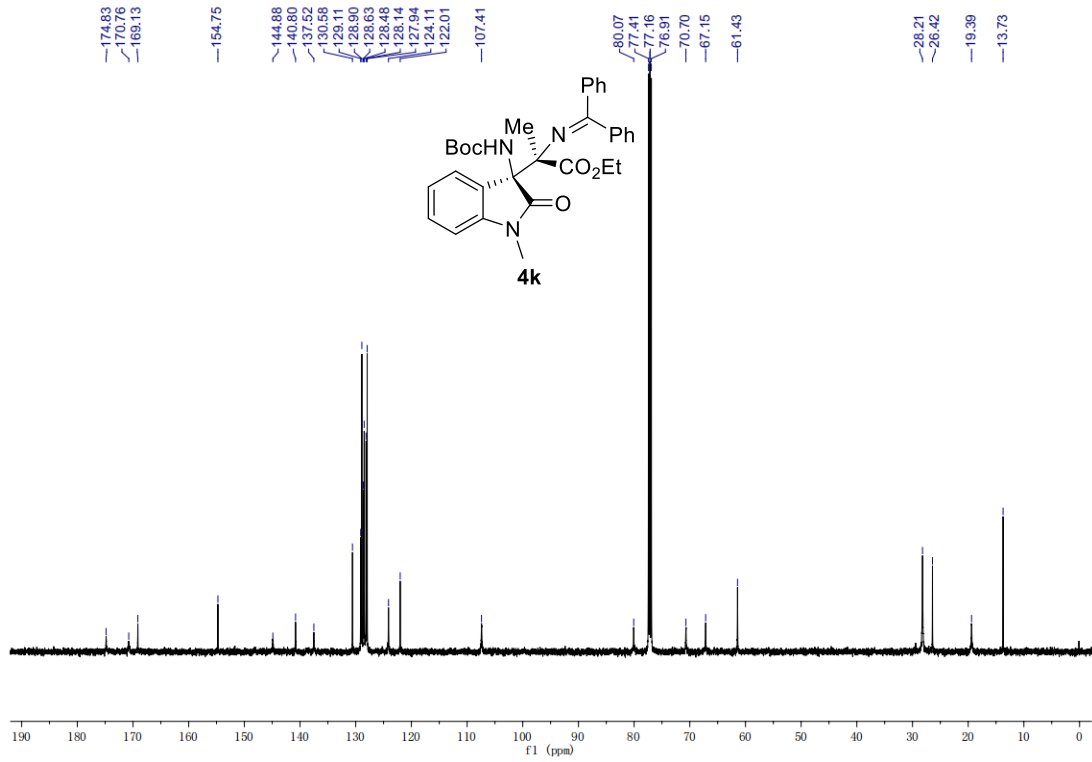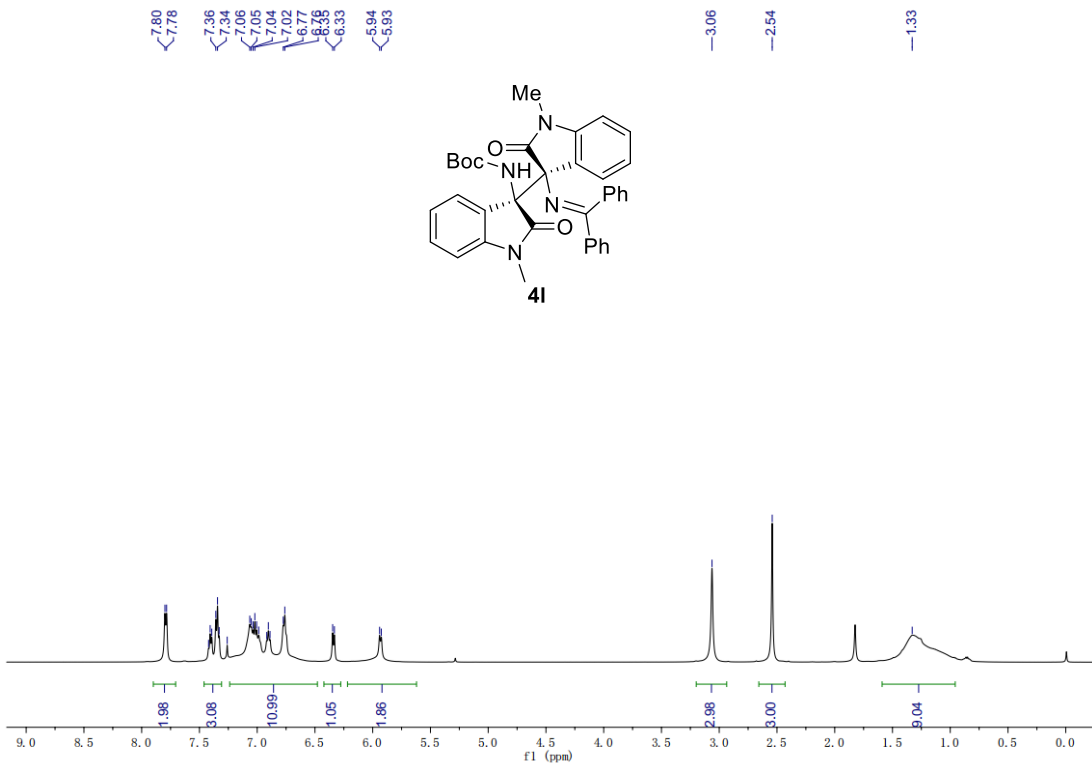

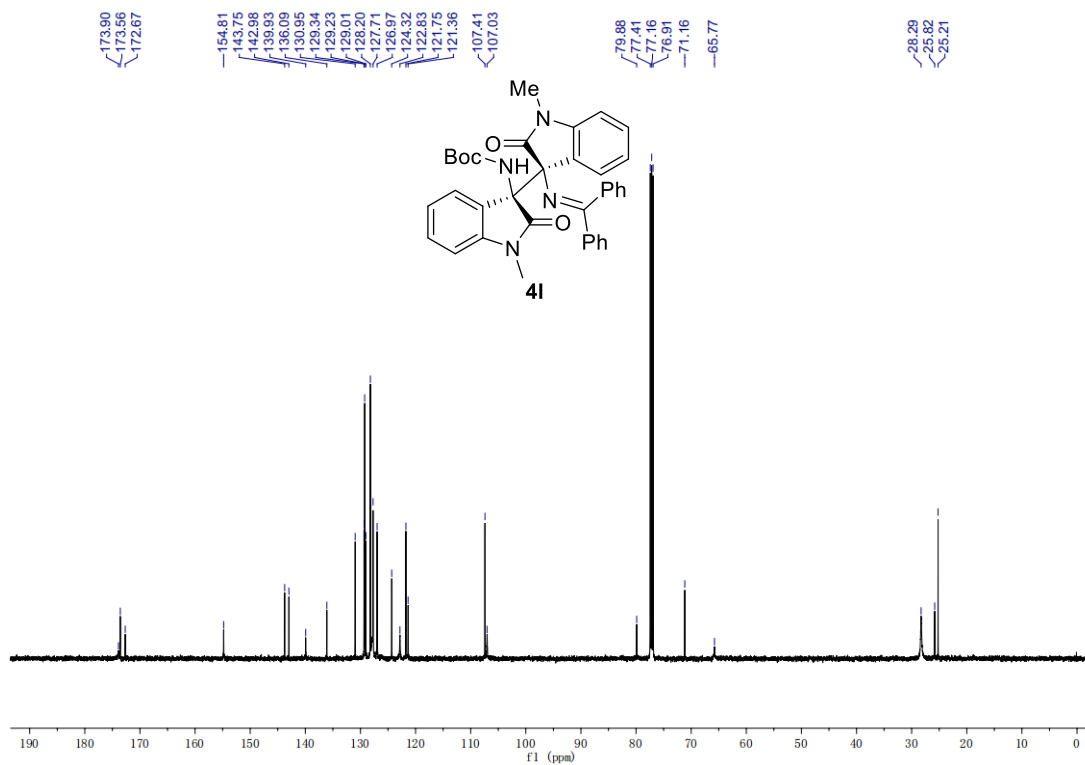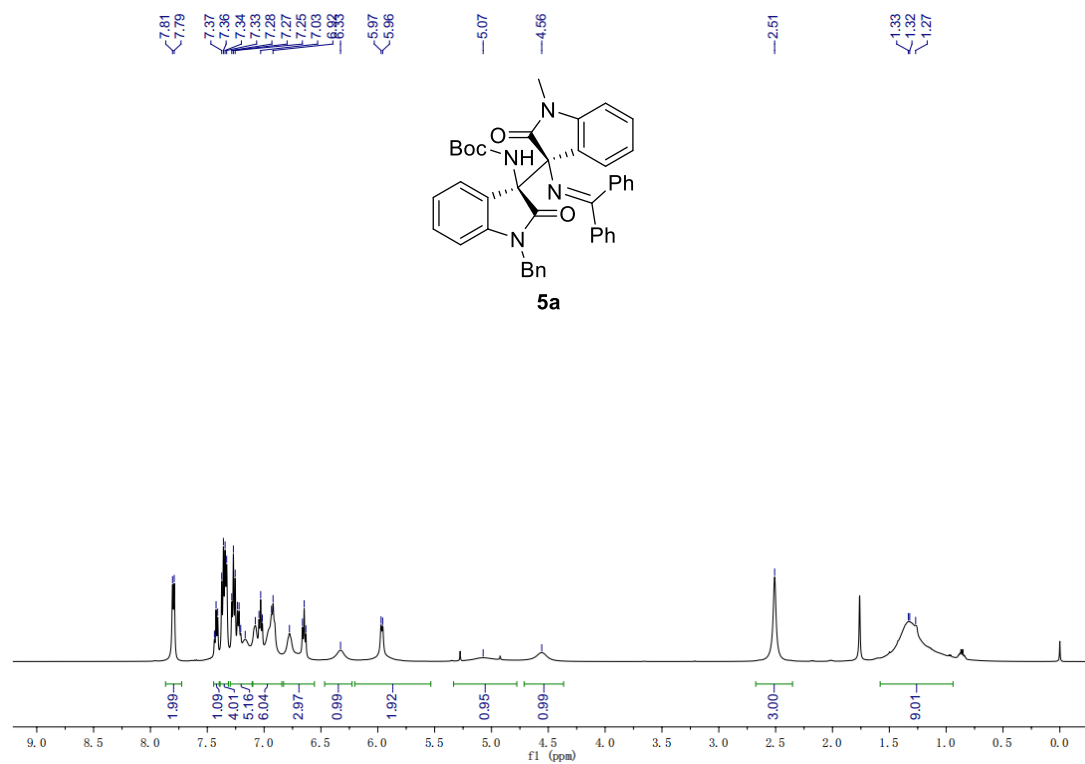



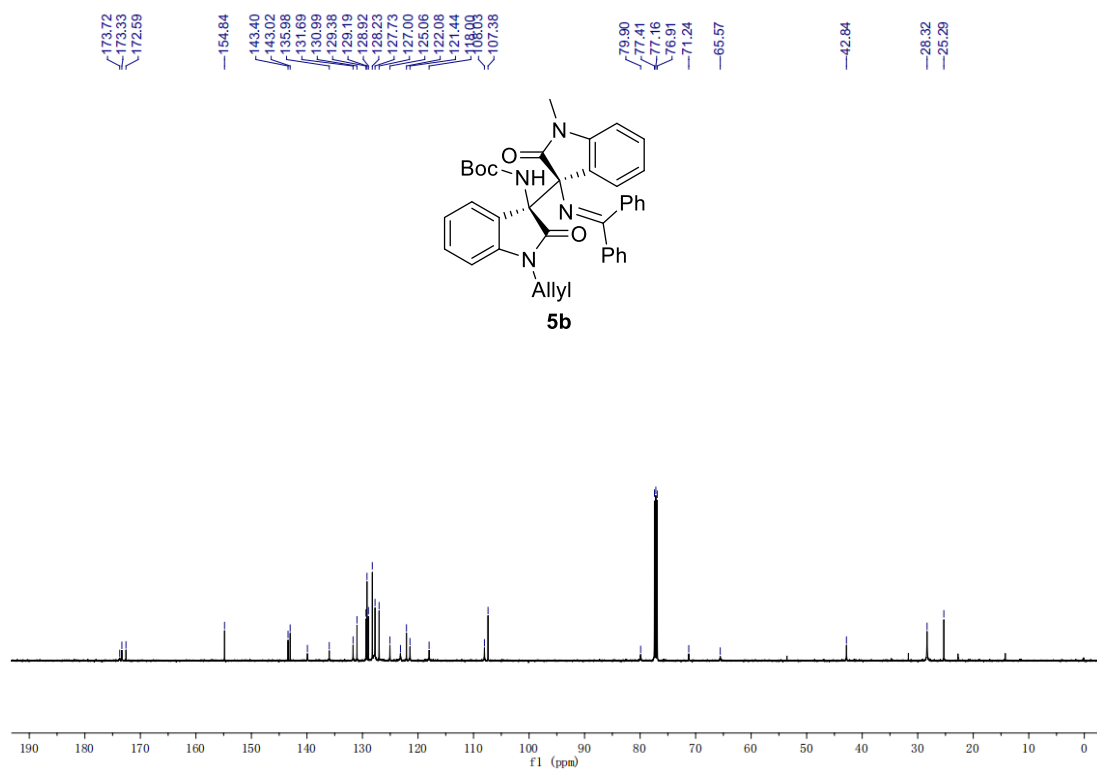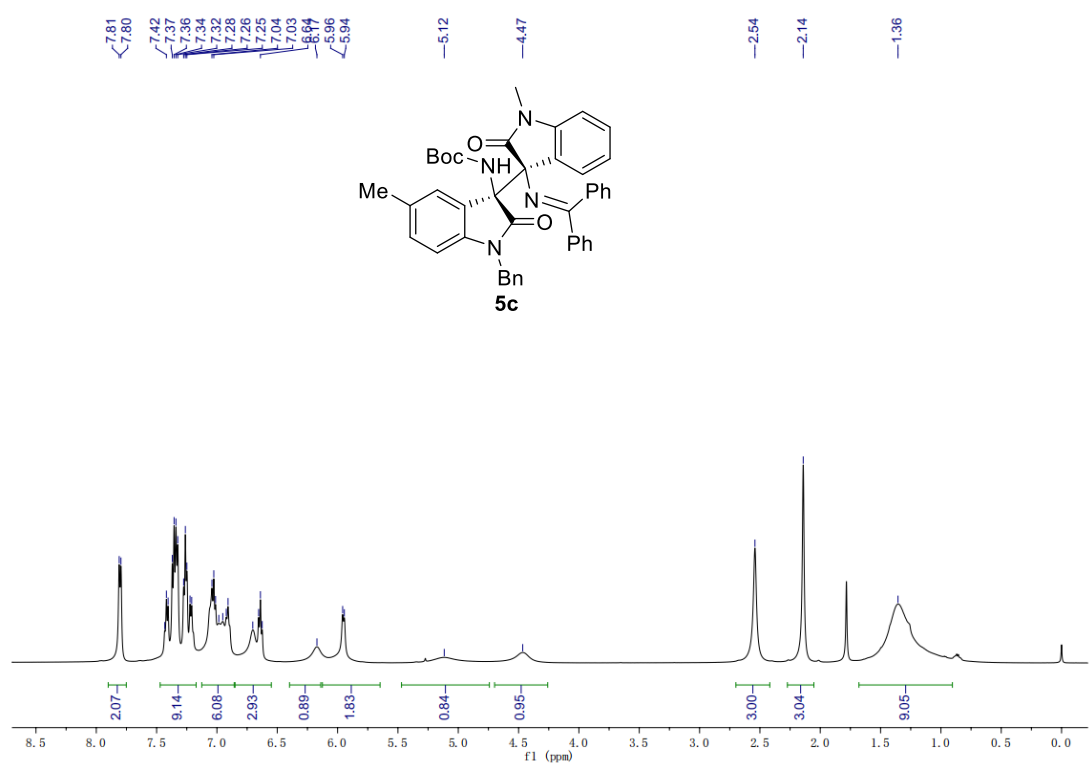



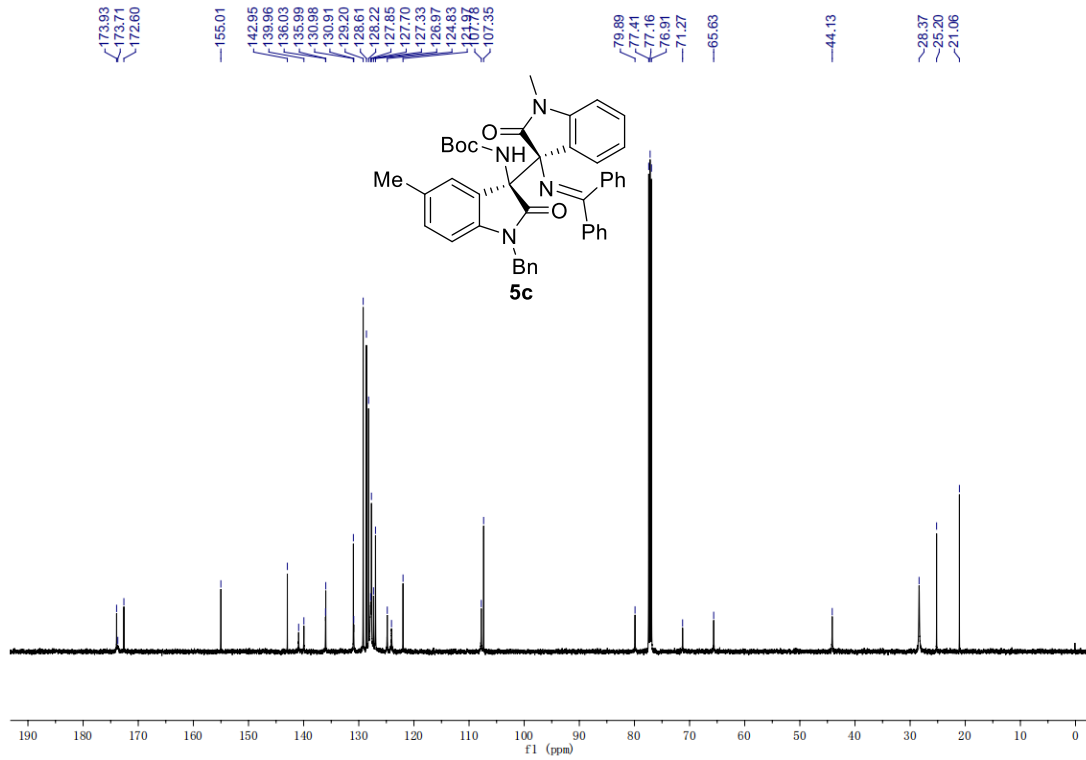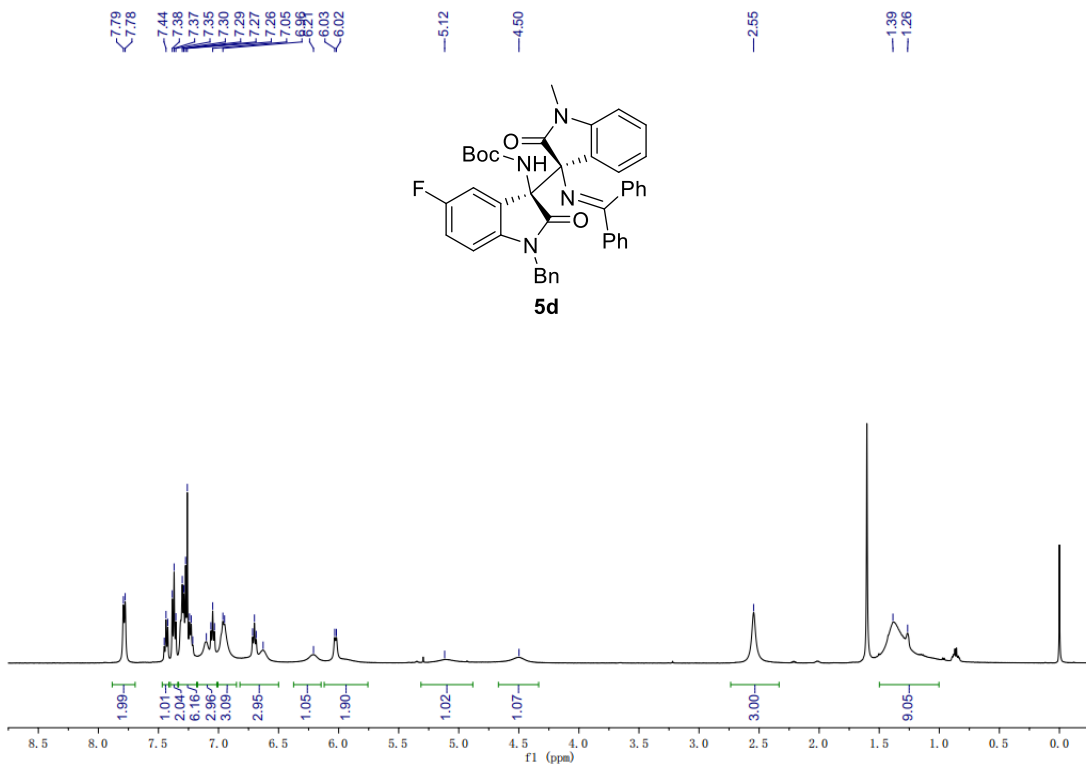

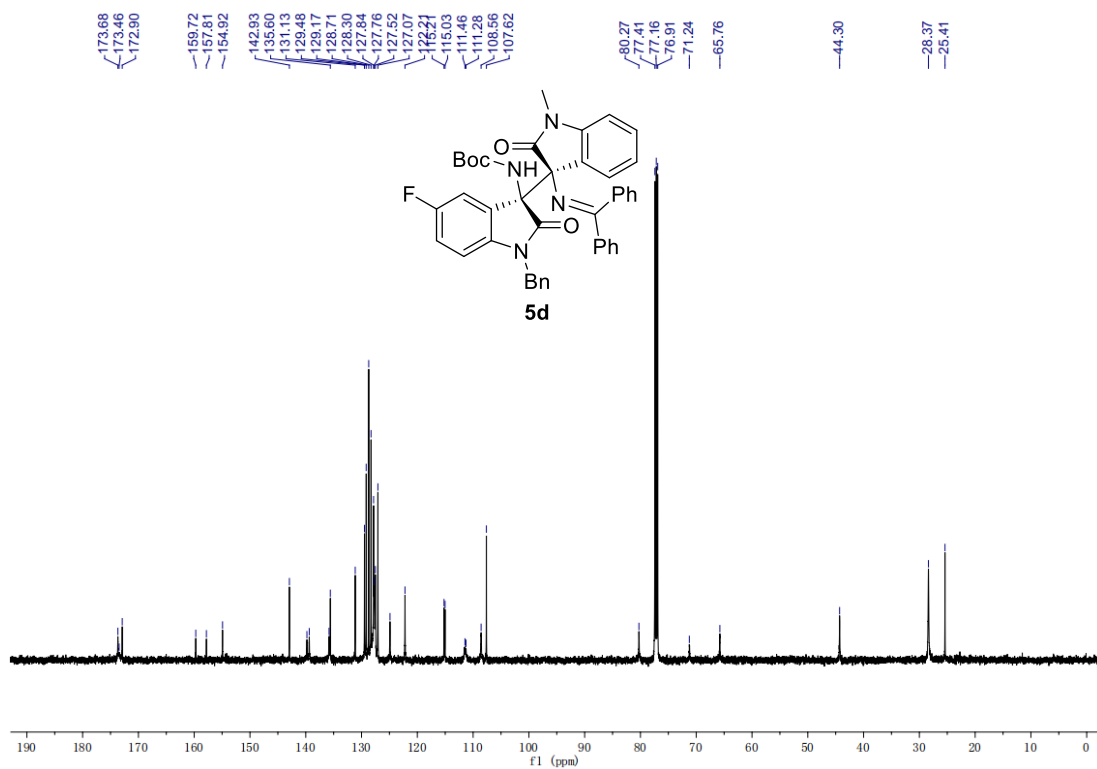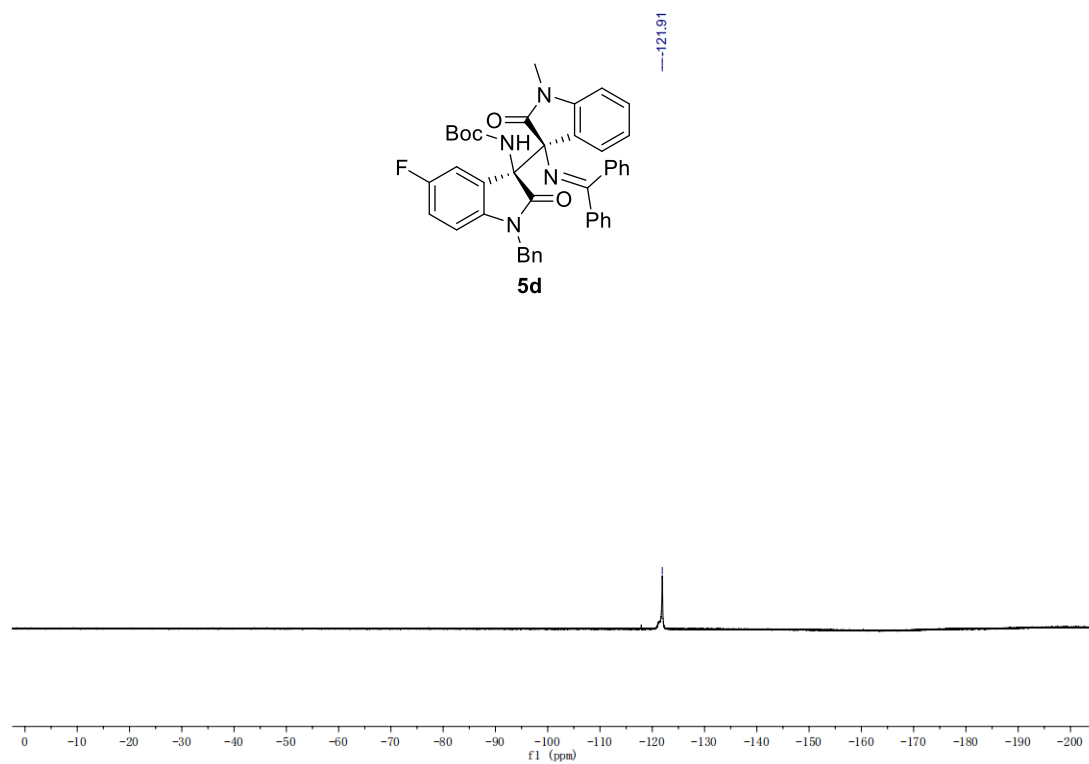



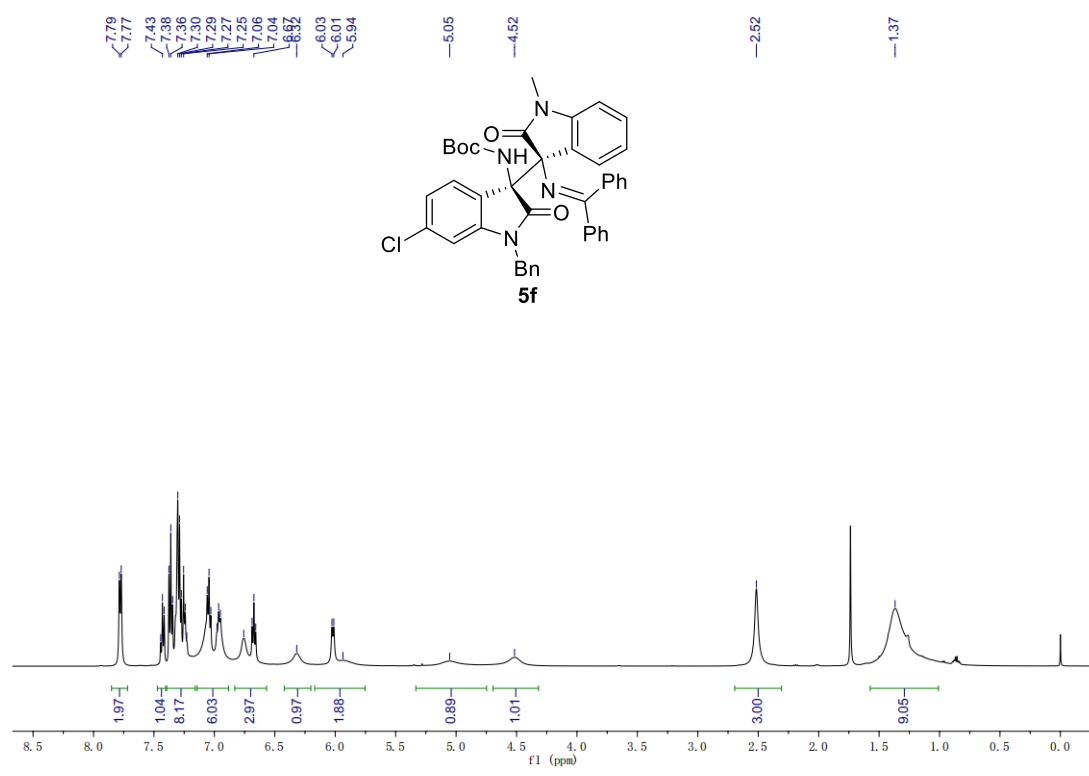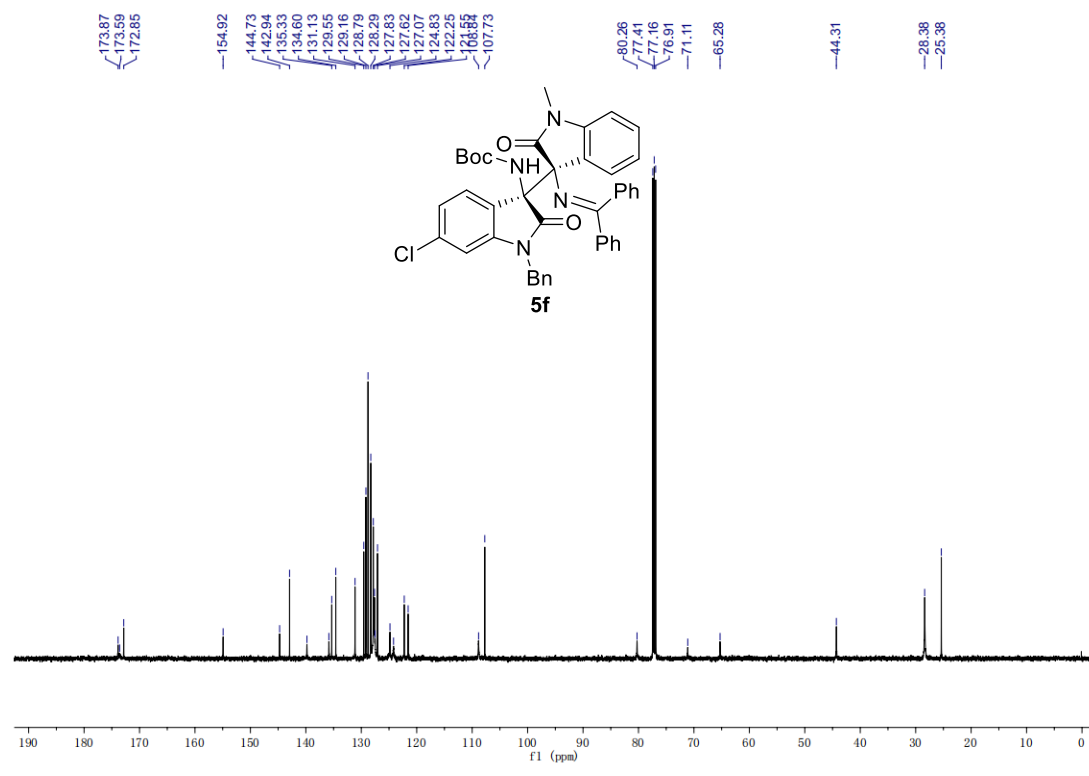

7.78  
7.77  
7.37  
7.36  
7.30  
7.29  
7.06  
6.88  
6.67  
6.66  
6.47  
6.03  
6.02  
5.94

5.05

4.52

2.52

1.37

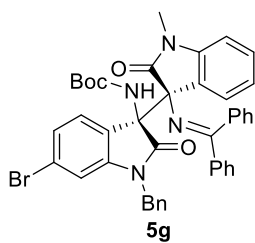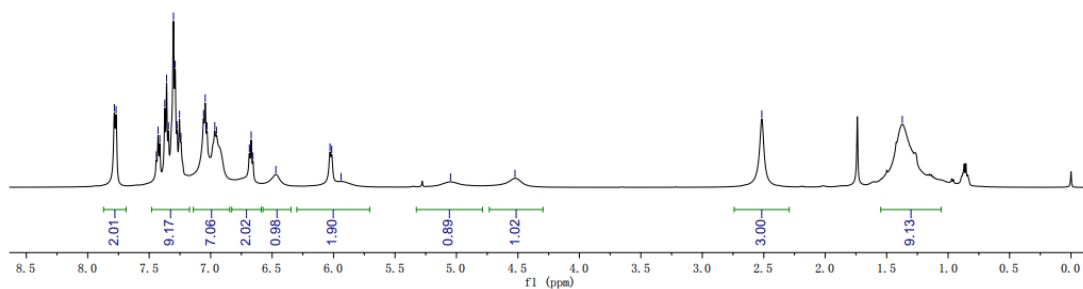

173.75  
173.54  
172.83

154.91

142.92

135.32

130.62

129.16

128.78

128.28

127.83

127.61

127.07

124.82

124.48

122.63

122.56

107.74

80.26

77.41

77.16

76.91

71.04

65.31

44.29

28.38

25.38

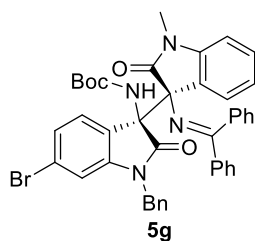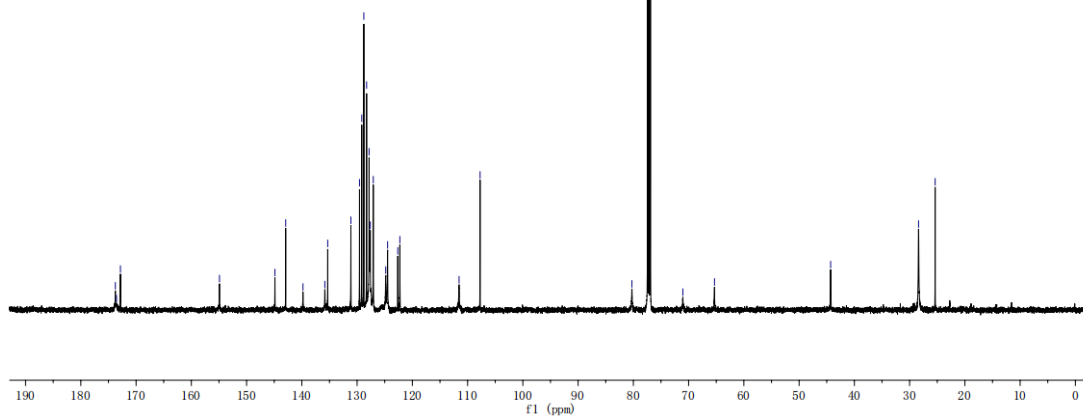

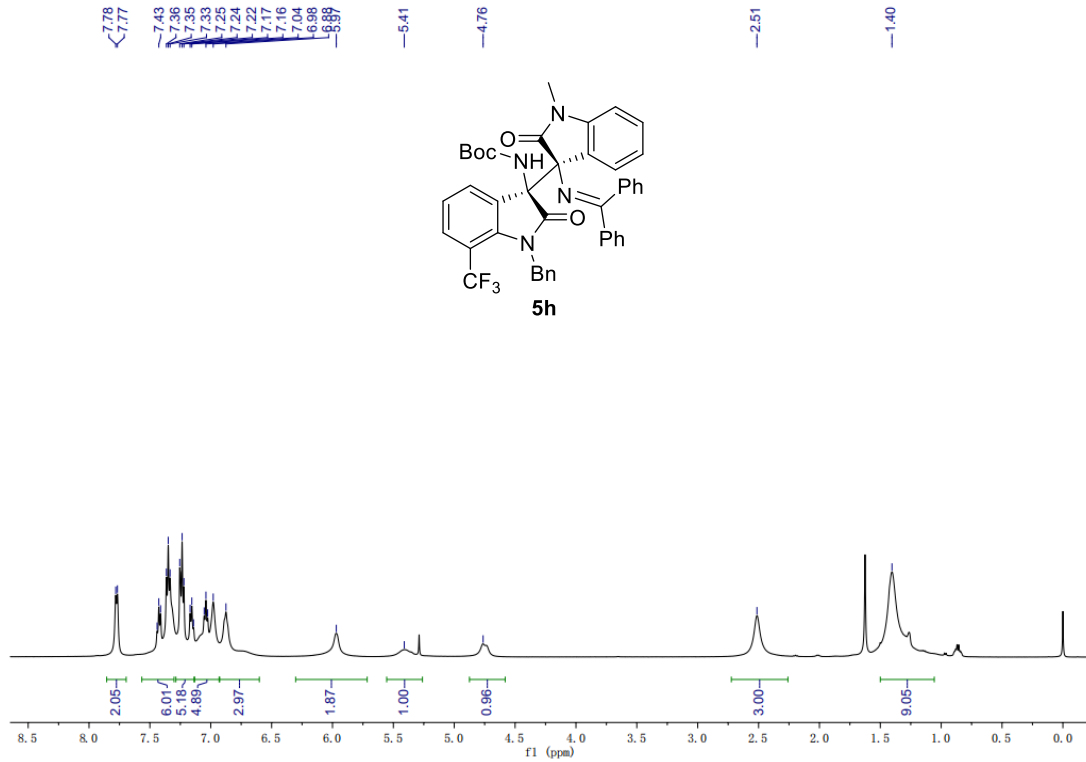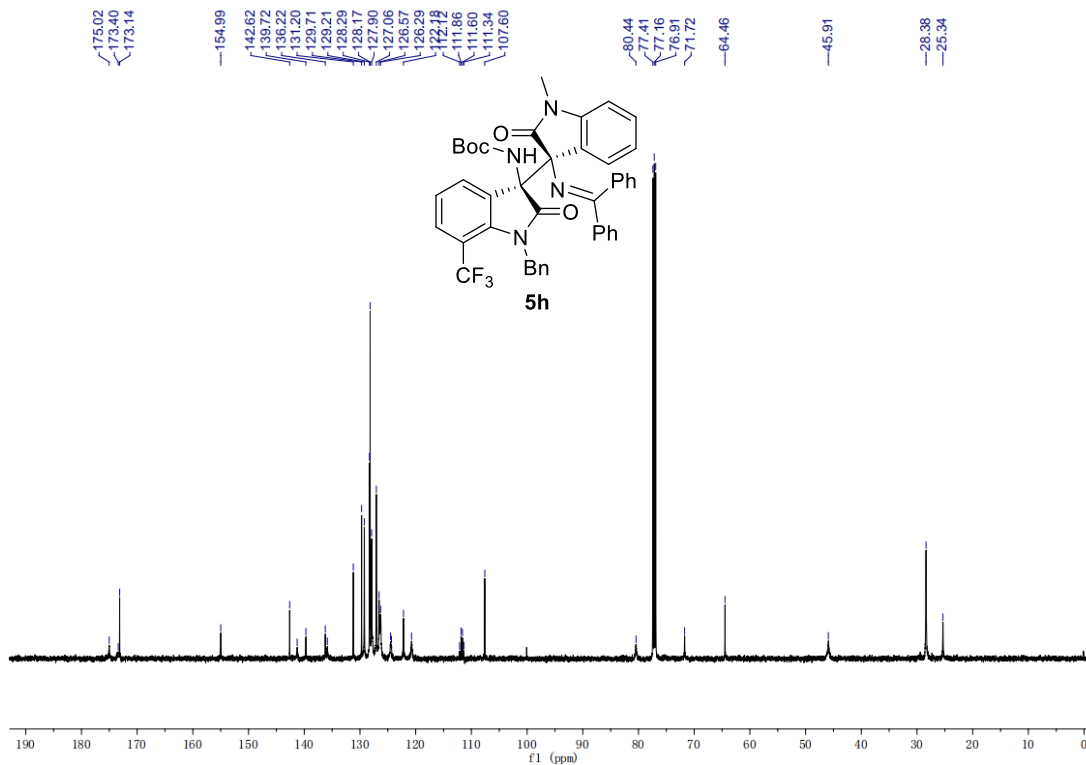

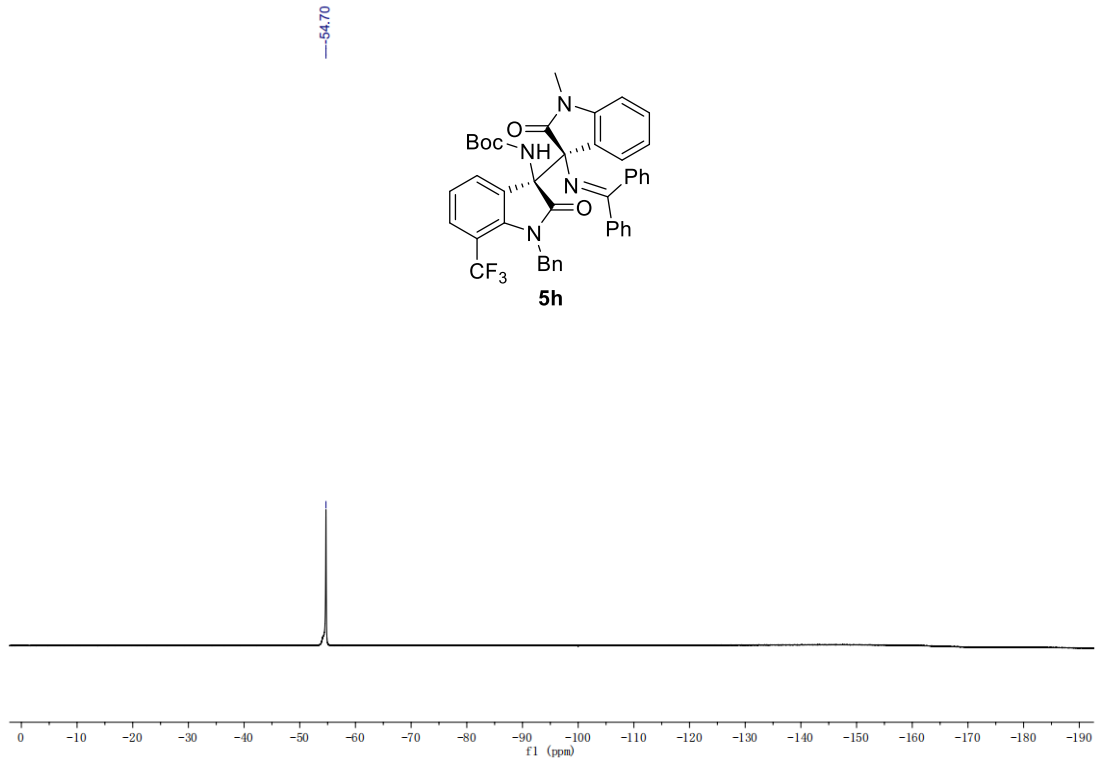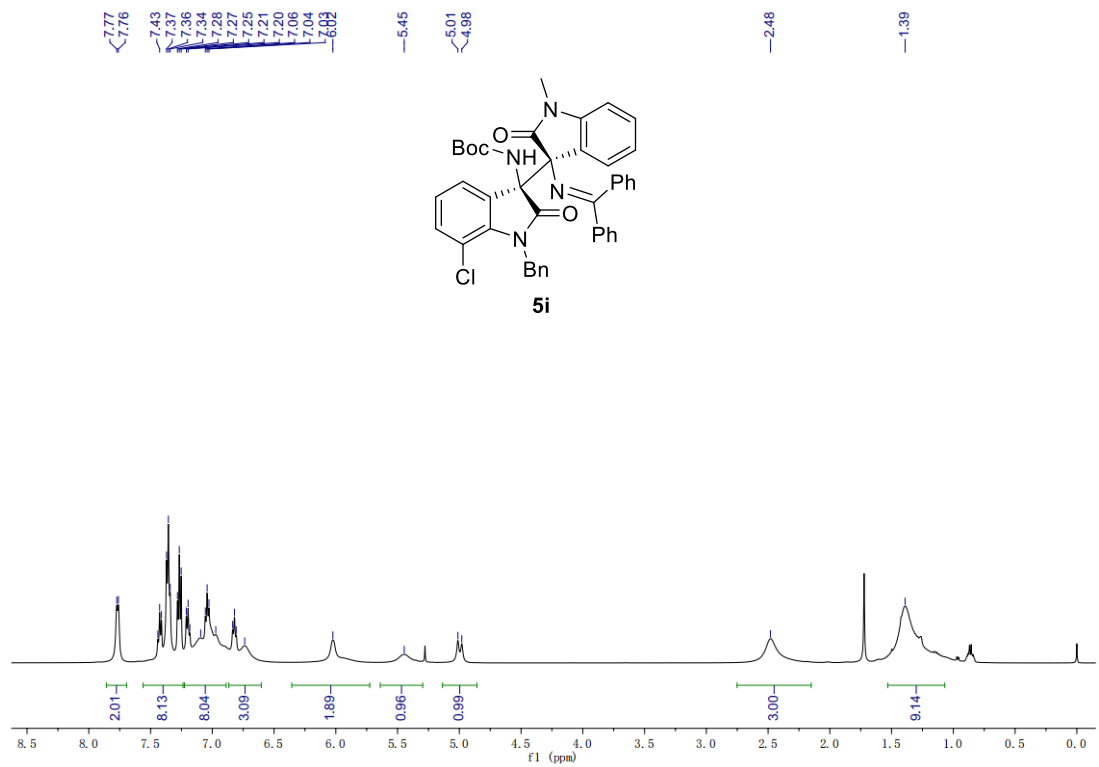

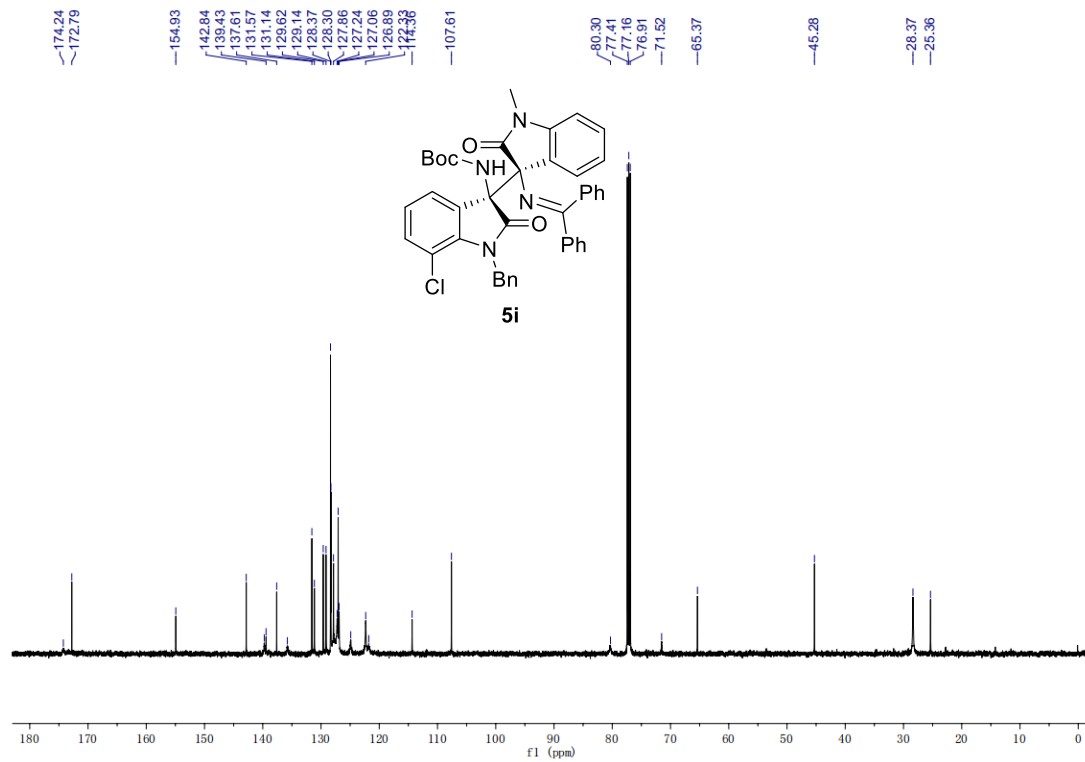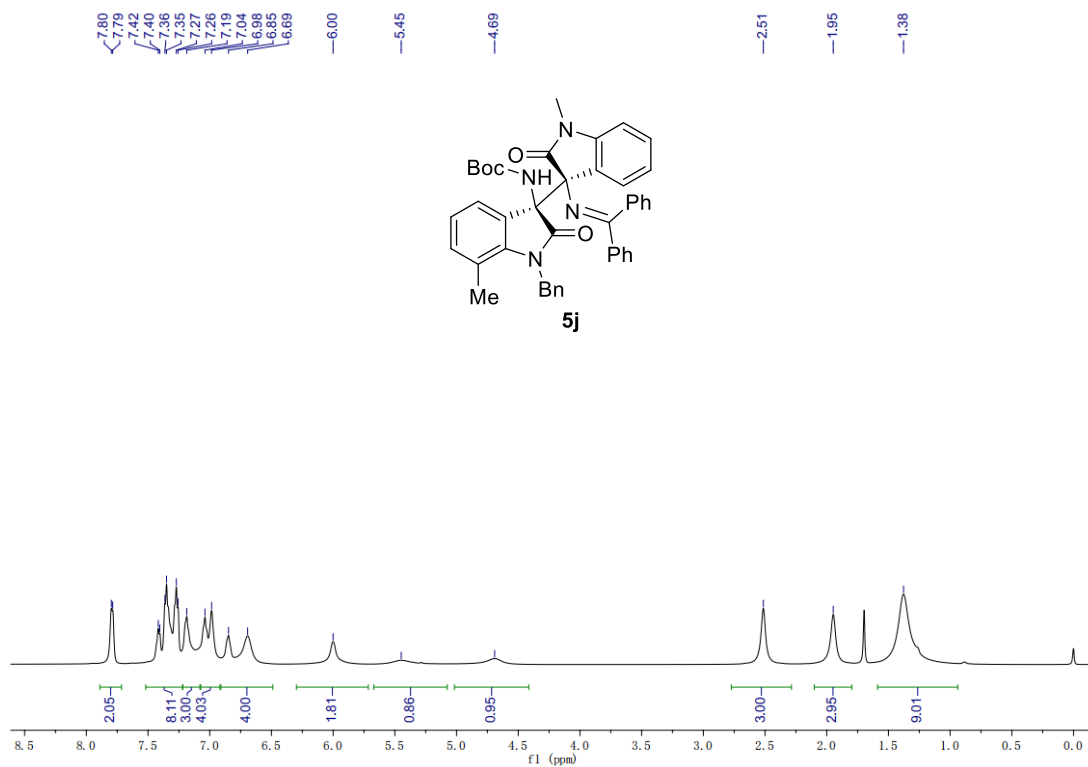



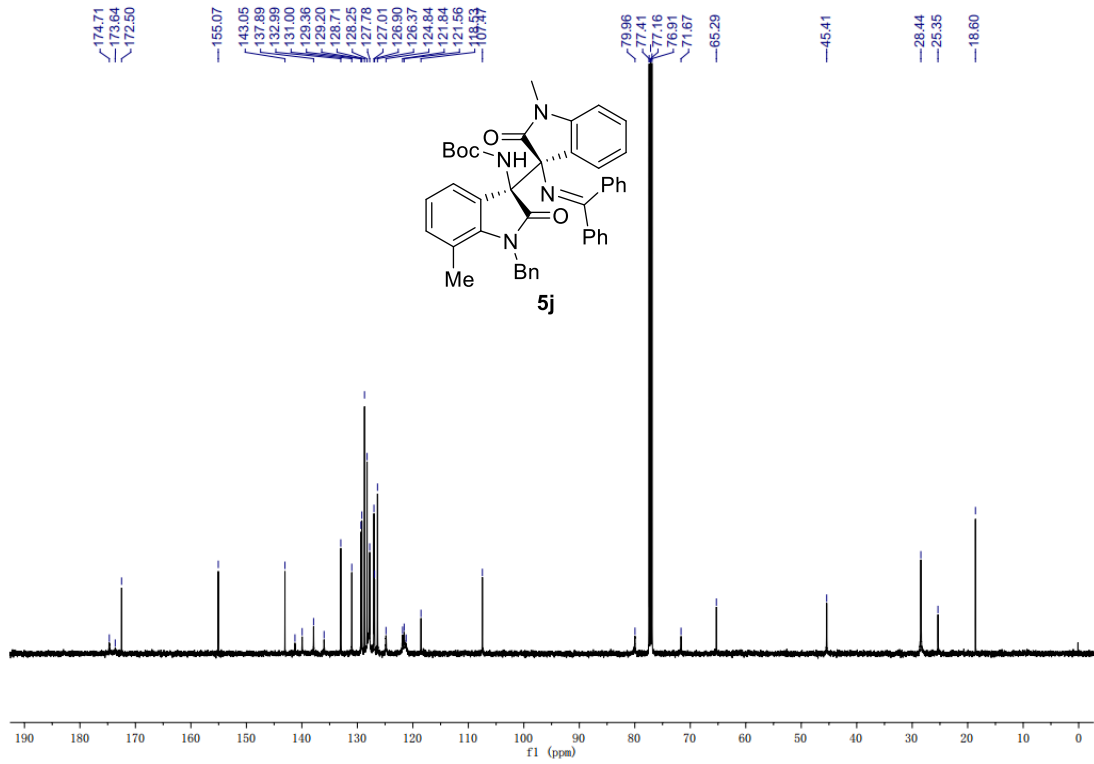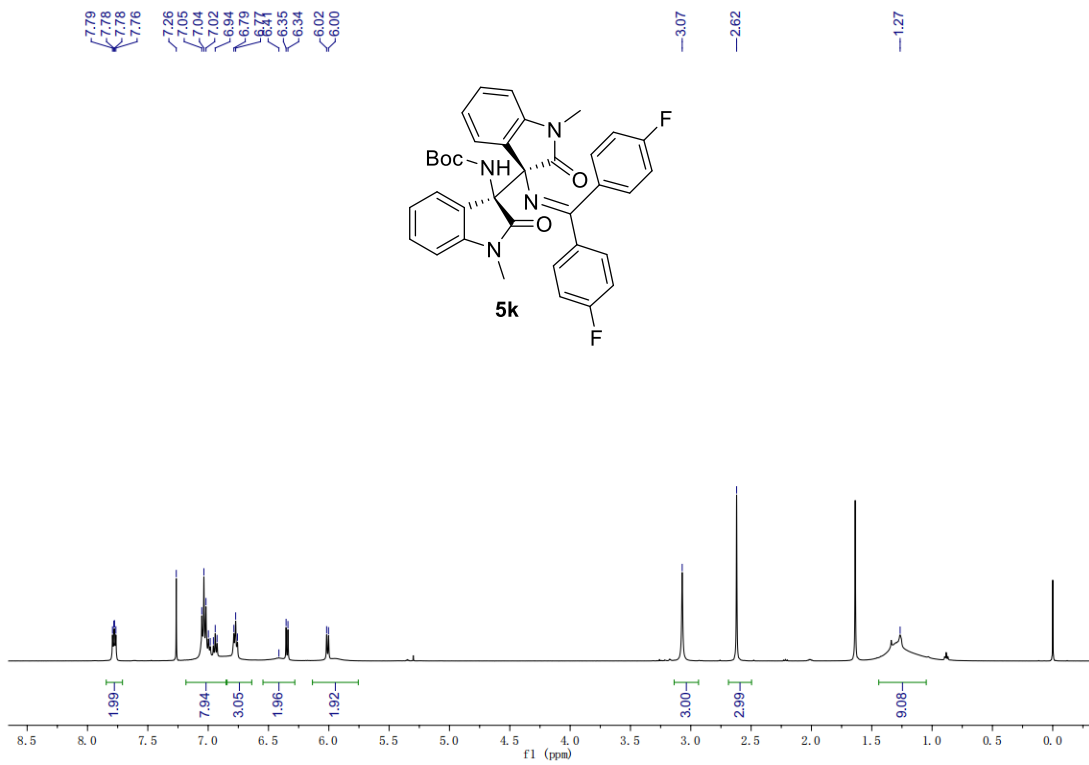



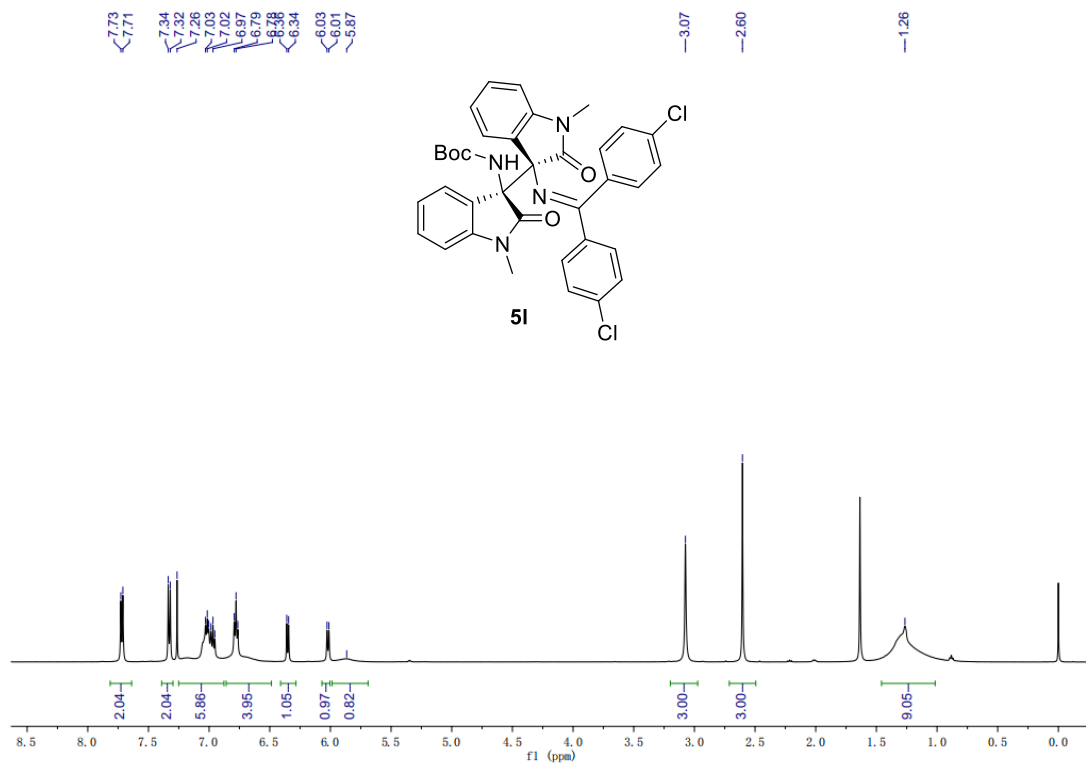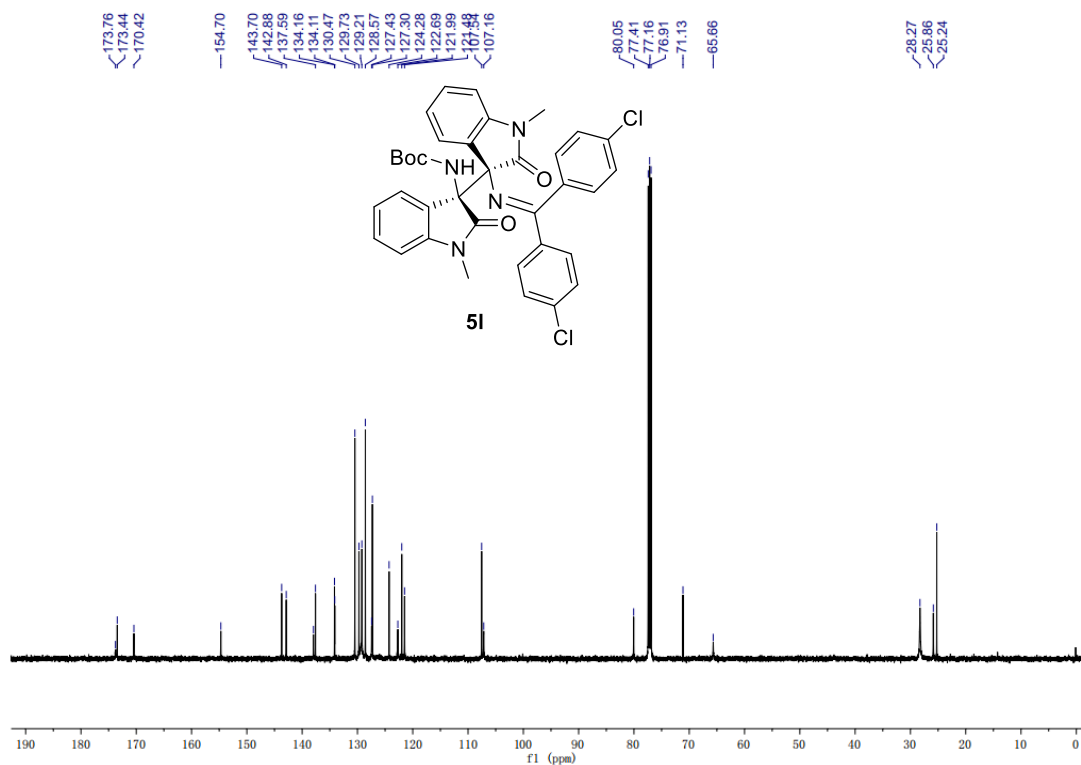

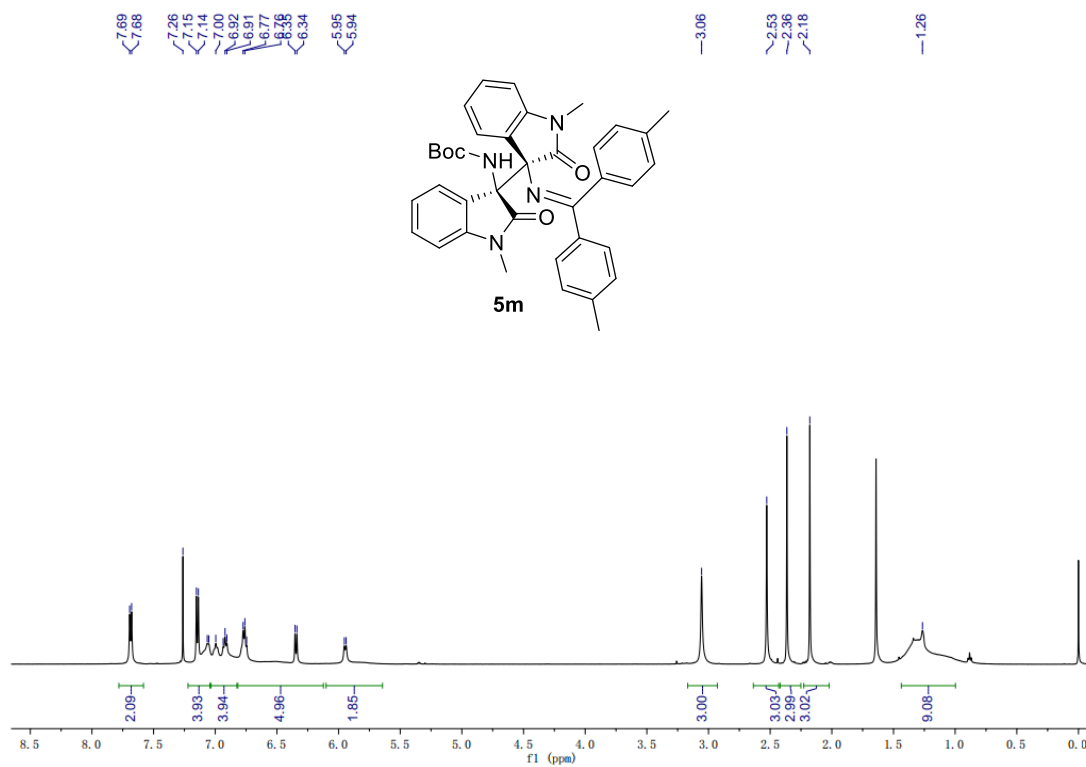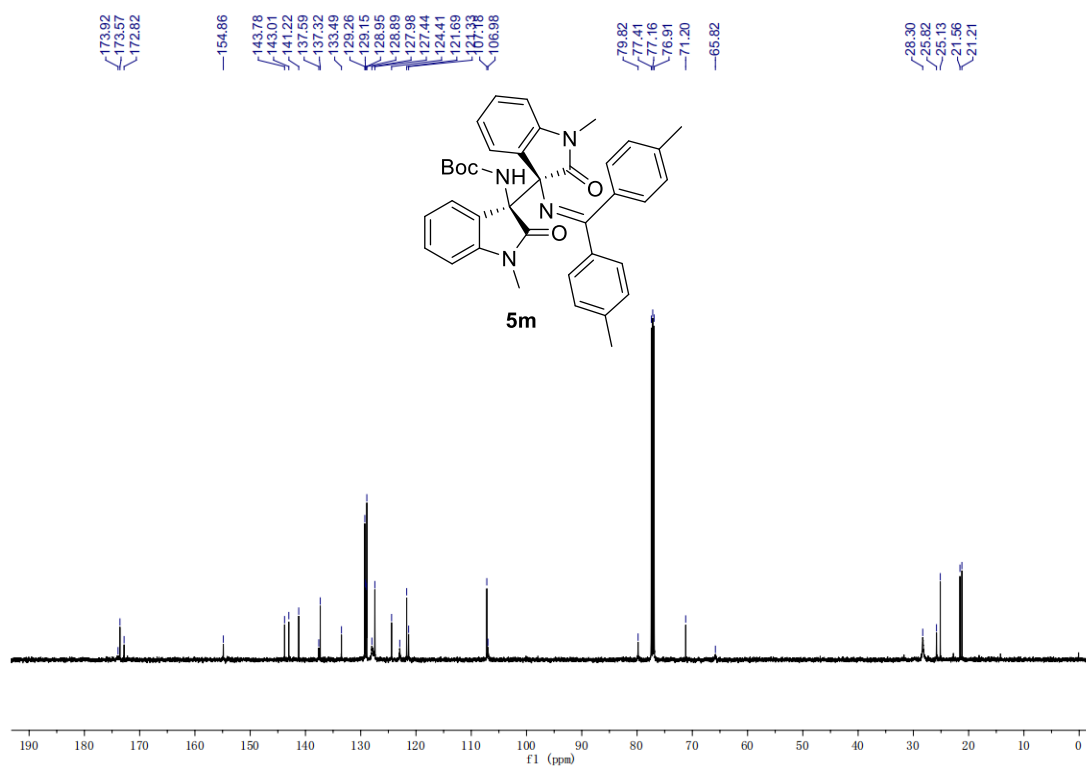

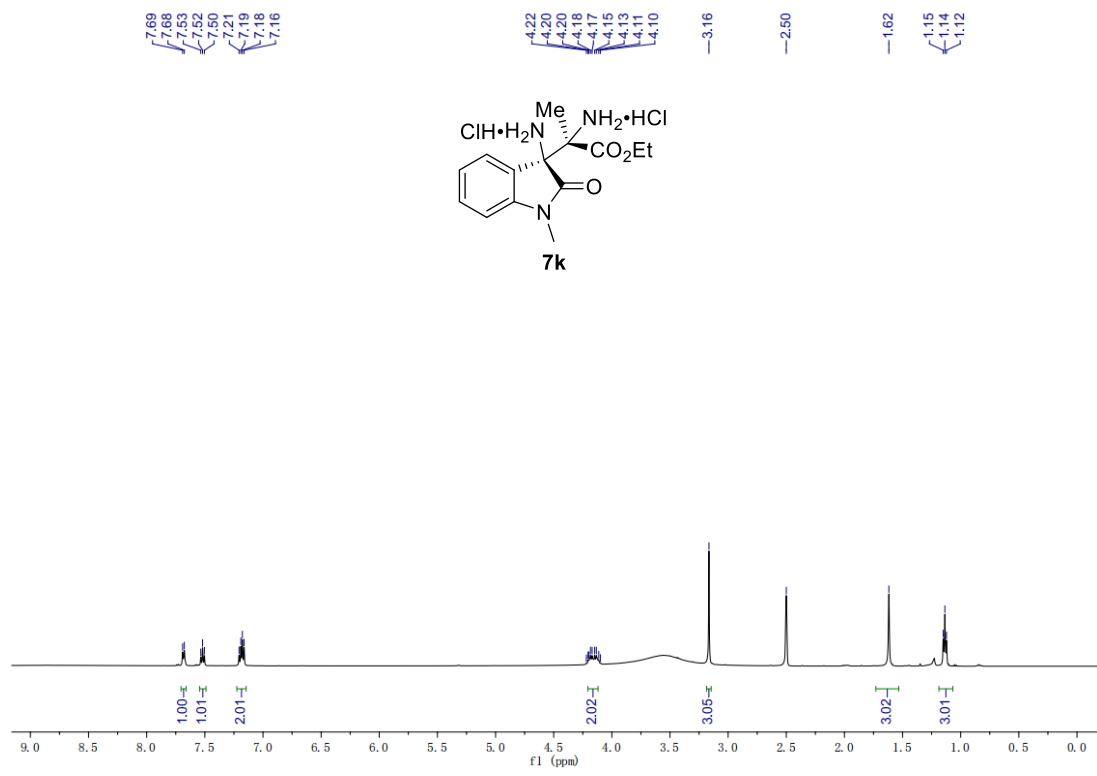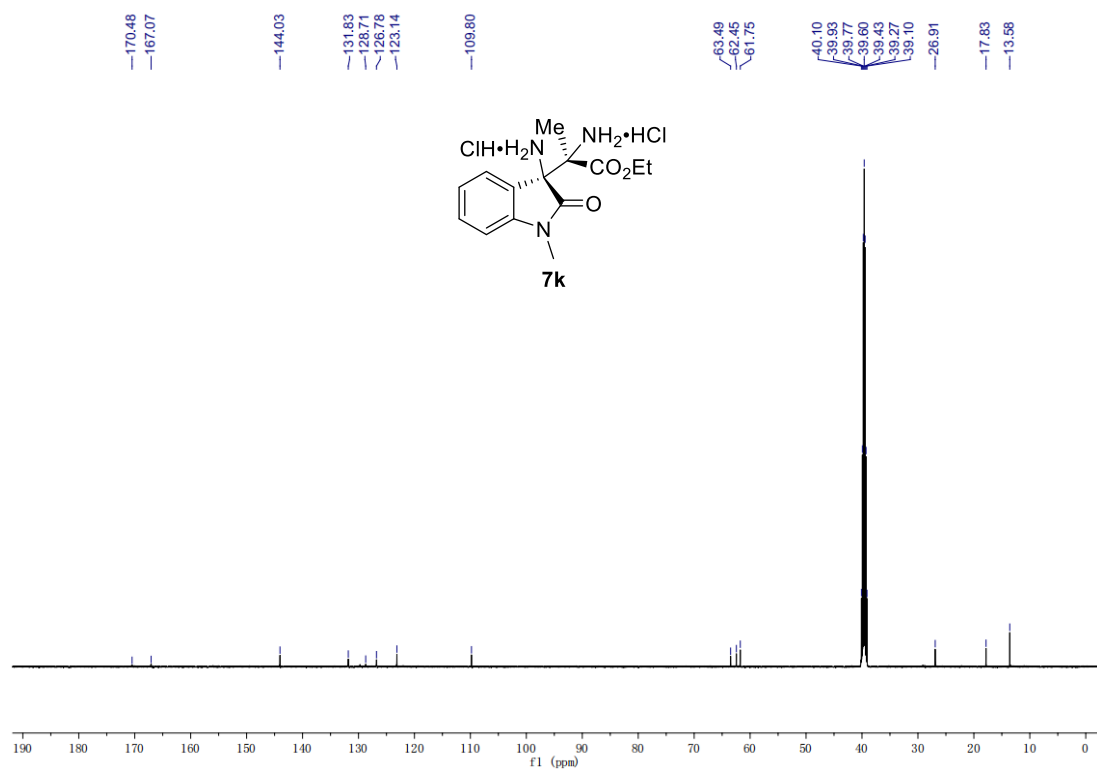

## Crystallographic Data for Compound 4j (CCDC: 2031206)

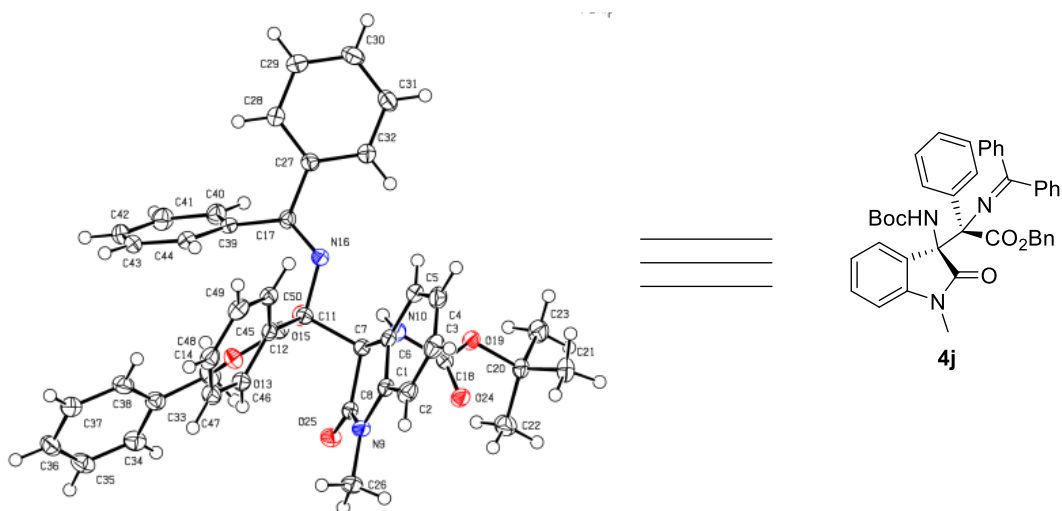

Bond precision: C-C = 0.0018 Å      Wavelength=1.54184

Cell:            a=11.5527(2)      b=12.5920(2)      c=12.7428(2)  
                   alpha=93.774(1)    beta=106.734(1)    gamma=92.270(1)

Temperature: 100 K

|                        | Calculated    | Reported      |
|------------------------|---------------|---------------|
| Volume                 | 1768.04(5)    | 1768.03(5)    |
| Space group            | P -1          | P -1          |
| Hall group             | -P 1          | -P 1          |
| Moiety formula         | C42 H39 N3 O5 | C42 H39 N3 O5 |
| Sum formula            | C42 H39 N3 O5 | C42 H39 N3 O5 |
| Mr                     | 665.76        | 665.76        |
| Dx, g cm <sup>-3</sup> | 1.251         | 1.251         |
| Z                      | 2             | 2             |
| Mu (mm <sup>-1</sup> ) | 0.661         | 0.661         |
| F000                   | 704.0         | 704.0         |
| F000'                  | 706.09        |               |
| h, k, lmax             | 14, 15, 16    | 14, 15, 16    |
| Nref                   | 7438          | 7101          |
| Tmin, Tmax             | 0.820, 0.876  | 0.871, 1.000  |
| Tmin'                  | 0.820         |               |

Correction method= # Reported T Limits: Tmin=0.871 Tmax=1.000  
 AbsCorr = MULTI-SCAN

Data completeness= 0.955      Theta (max)= 76.553

R(reflections)= 0.0339( 6346)      wR2(reflections)= 0.0884( 7101)

S = 1.070      Npar= 460

## Crystallographic Data for Compound 5e (CCDC: 2027504)

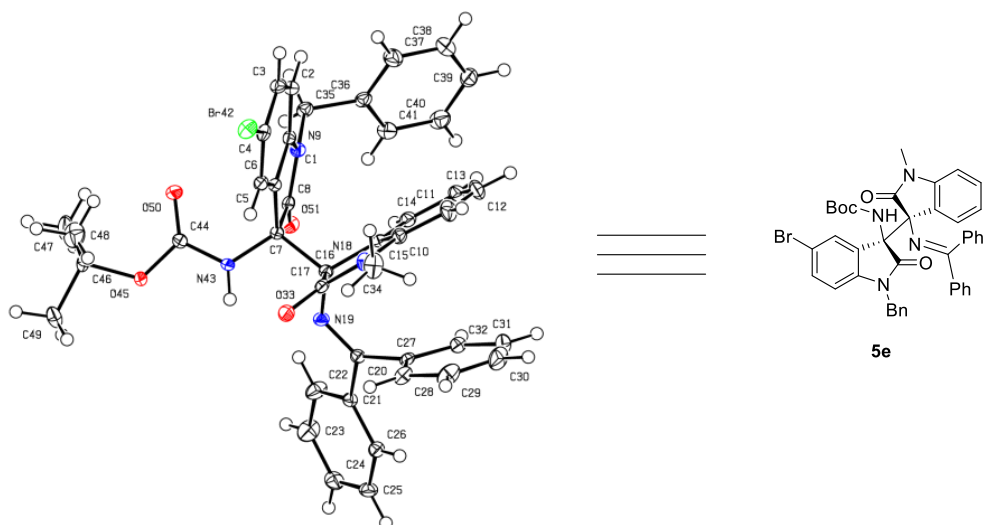

Bond precision: C-C = 0.0025 Å

Wavelength=1.54184

Cell: a=9.4441 (1) b=11.6792 (1) c=17.5110 (1)  
 alpha=96.600 (1) beta=104.395 (1) gamma=100.362 (1)  
 Temperature: 100 K

|                        | Calculated       | Reported         |
|------------------------|------------------|------------------|
| Volume                 | 1814.29 (3)      | 1814.29 (3)      |
| Space group            | P -1             | P -1             |
| Hall group             | -P 1             | -P 1             |
| Moiety formula         | C42 H37 Br N4 O4 | C42 H37 Br N4 O4 |
| Sum formula            | C42 H37 Br N4 O4 | C42 H37 Br N4 O4 |
| Mr                     | 741.66           | 741.66           |
| Dx, g cm <sup>-3</sup> | 1.358            | 1.358            |
| Z                      | 2                | 2                |
| Mu (mm <sup>-1</sup> ) | 1.930            | 1.930            |
| F000                   | 768.0            | 768.0            |
| F000'                  | 768.69           |                  |
| h, k, lmax             | 11, 14, 22       | 11, 14, 21       |
| Nref                   | 7566             | 7215             |
| Tmin, Tmax             | 0.588, 0.680     | 0.836, 1.000     |
| Tmin'                  | 0.534            |                  |

Correction method= # Reported T Limits: Tmin=0.836 Tmax=1.000  
 AbsCorr = MULTI-SCAN

Data completeness= 0.954 Theta(max)= 75.988

R(reflections)= 0.0322 ( 7002) wR2(reflections)= 0.0868 ( 7215)

S = 1.098 Npar= 468
